# Supplementary material for: pH-Responsive N^C-Cyclometalated Iridium(III) Complexes: Synthesis, Photophysical Properties, Computational Results, and Bioimaging Application
Source: MDPI journal article supplement (doi:10.3390/molecules27010232), 2021-12-30
Supplement: s1 [file s1]

## Supporting Information

for

### pH-Responsive N<sup>4</sup>C-cyclometalated iridium(III) complexes: synthesis, photophysical properties, computational results, and bioimaging application

Anastasia I. Solomatina\*, Daria O. Kozina, Vitaly V. Porsev\*, Sergey P. Tunik\*

Institute of Chemistry, St. Petersburg State University, Universitetskii av., 26, 198504 St. Petersburg, Russia; nastisol@gmail.com (A.I.S.); kozina.d@yandex.ru (D.O.K.); v.porsev@spbu.ru (V.V.P.); sergey.tunik@spbu.ru (S.P.T.)

## Content

|                                                                                      |    |
|--------------------------------------------------------------------------------------|----|
| Part 1. XRD-analysis, NMR spectroscopy and ESI mass-spectrometry data .....          | 1  |
| Part 2. Photophysical properties of complexes <b>1-4</b> and N <sup>4</sup> CH ..... | 10 |
| Part 3. Computational results.....                                                   | 14 |

### Part 1. XRD-analysis, NMR spectroscopy and ESI mass-spectrometry data

Table S1. Selected bond distances (Å) and angles (°) in the structure of **2**.

|                                                                                     |          |           |         |           |           |
|-------------------------------------------------------------------------------------|----------|-----------|---------|-----------|-----------|
| 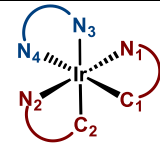 |          |           |         |           |           |
| Distances, Å                                                                        |          | Angles, ° |         | Angles, ° |           |
| Ir-C1                                                                               | 2.005(6) | N1-Ir-C1  | 79.7(2) | C1-Ir-N2  | 97.0(2)   |
| Ir-N1                                                                               | 2.040(5) | N2-Ir-C2  | 80.2(2) | N2-Ir-N4  | 88.13(18) |
| Ir-C2                                                                               | 2.016(5) | N3-Ir-N4  | 77.1(2) | N4-Ir-N1  | 95.4(2)   |
| Ir-N2                                                                               | 2.075(5) | C1-Ir-C2  | 85.7(2) | N3-Ir-N2  | 96.5(2)   |
| Ir-N3                                                                               | 2.132(4) | C2-Ir-N1  | 97.2(2) | N3-Ir-N1  | 86.23(17) |
| Ir-N4                                                                               | 2.128(5) | C2-Ir-N4  | 99.3(2) | N3-Ir-C1  | 98.2(2)   |

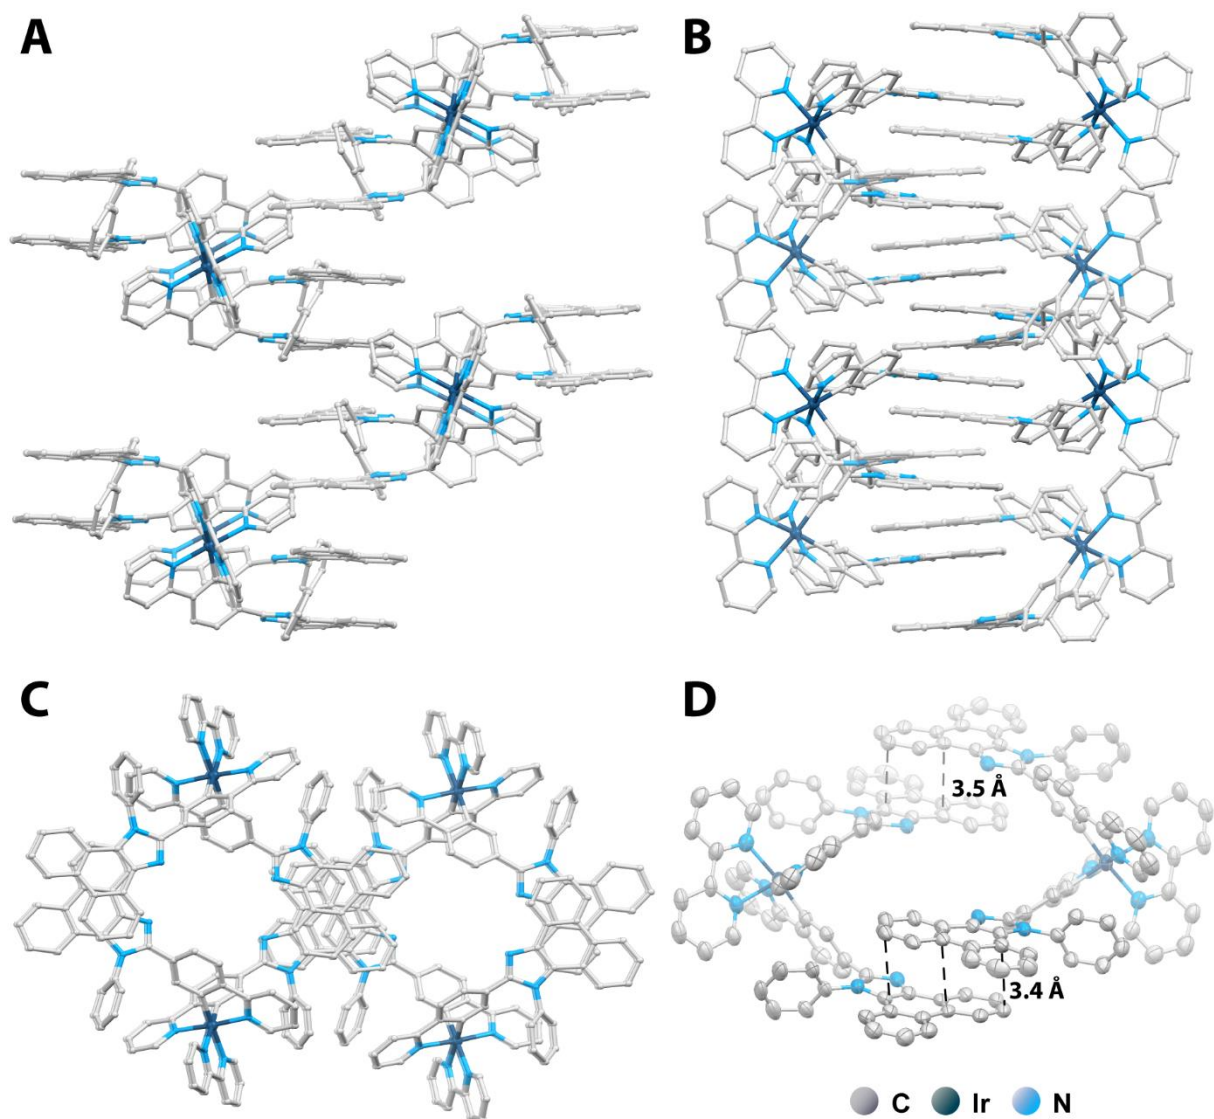

Figure S1. Perspective view of **2** packing in the solid state: A – front view, B – right view, C – top view, D – short  $\pi$ - $\pi$  interactions between phenanthrene moieties showing thermal ellipsoids at the 40% probability level (H-atoms are omitted for clarity).

**N<sup>^</sup>CH**

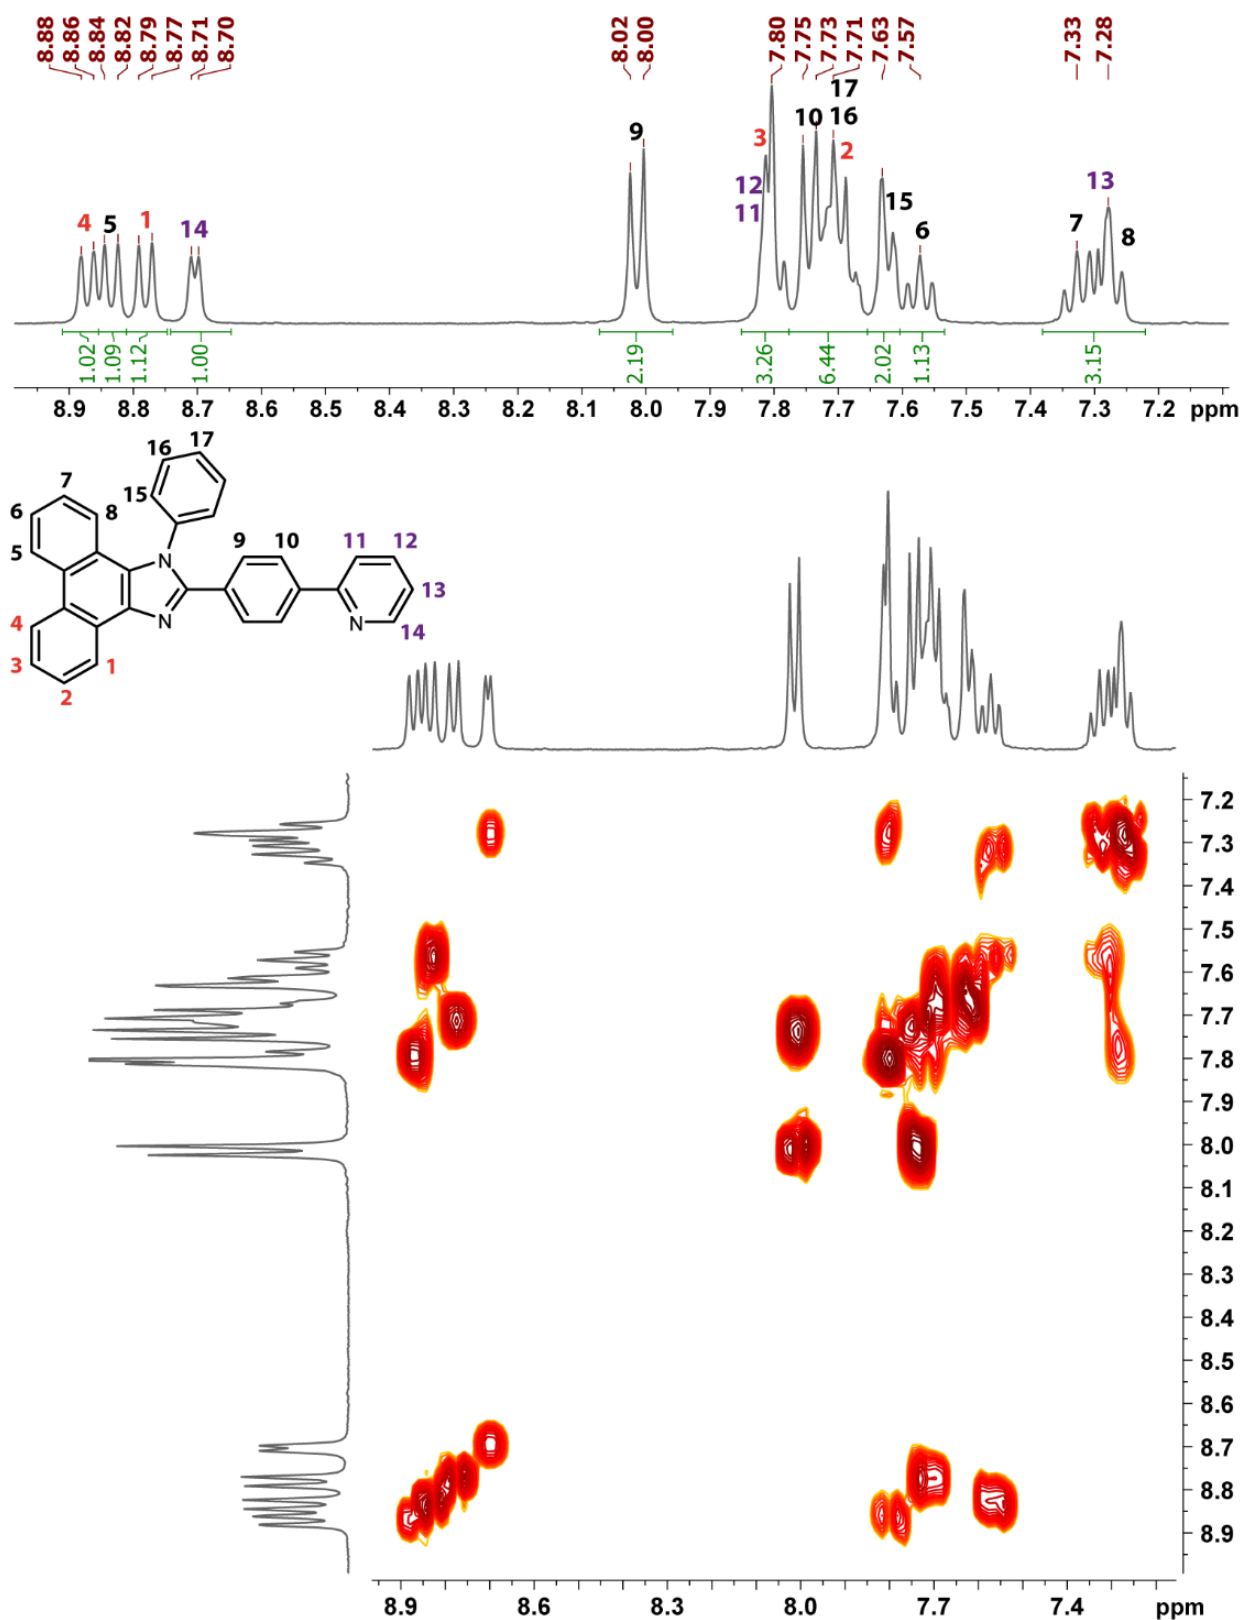

Figure S2.  $^1\text{H}$  and  $^1\text{H}$ - $^1\text{H}$  COSY NMR spectrum of **N<sup>^</sup>CH** in  $\text{CD}_2\text{Cl}_2$ , 298 K.

**N<sup>+</sup>CH + TFA**

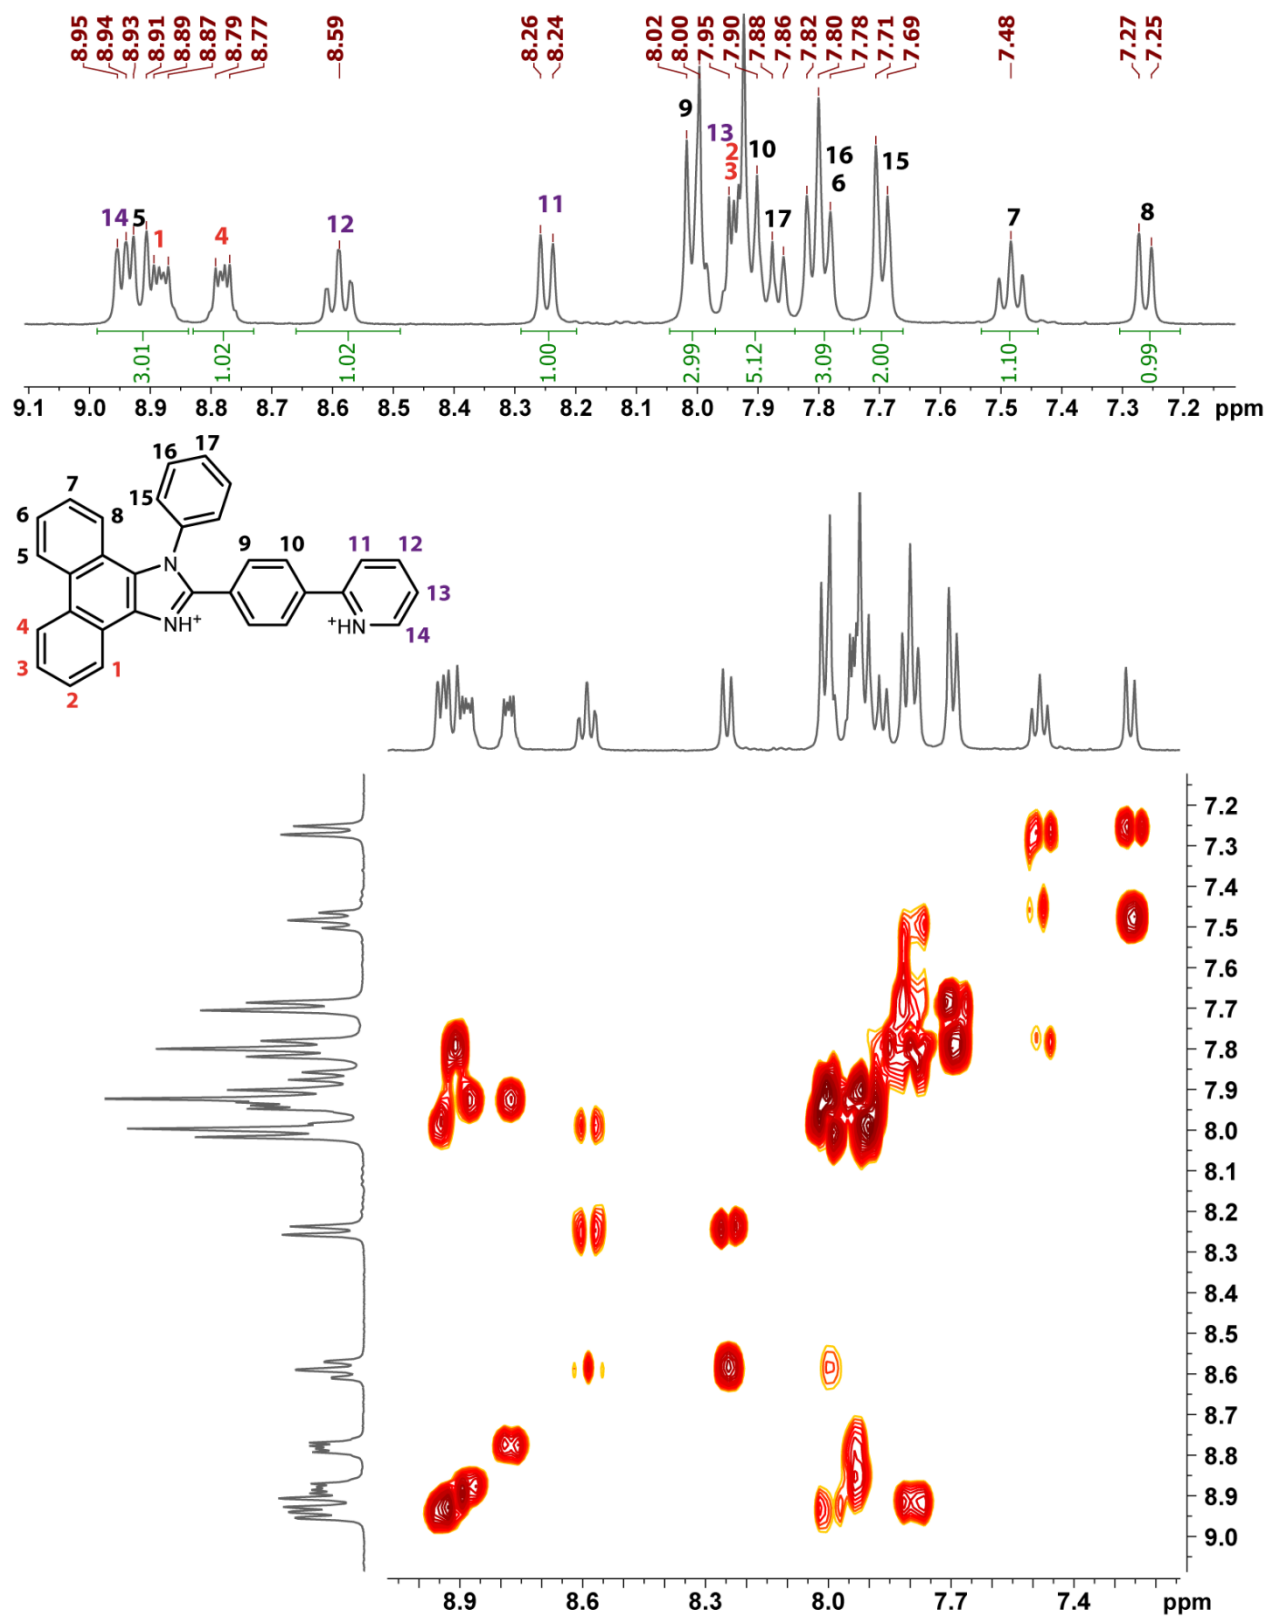

Figure S3. <sup>1</sup>H and <sup>1</sup>H-<sup>1</sup>H COSY NMR spectrum of N<sup>+</sup>CH in CD<sub>2</sub>Cl<sub>2</sub> with TFA, 298 K.

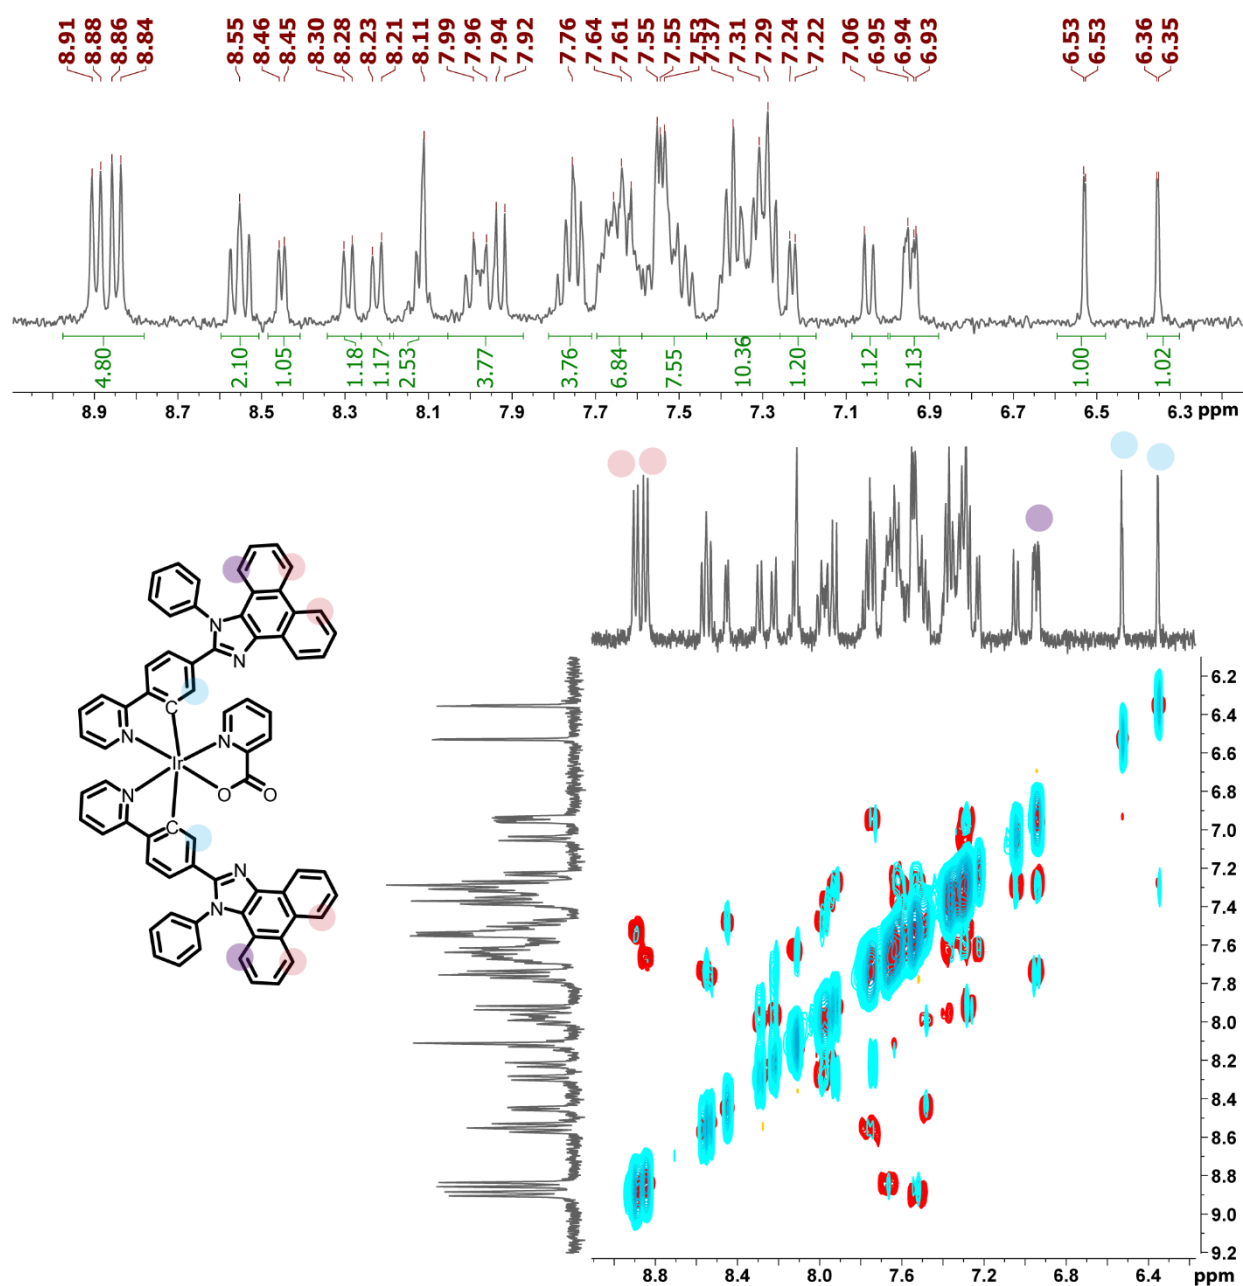

Figure S4.  $^1\text{H}$  and overlapped  $^1\text{H}$ - $^1\text{H}$  COSY and NOESY NMR spectra of complex **1** with assignment (given by different colours at the spectrum and structural pattern) of some signals to protons, DMSO- $d_6$ , 298 K.

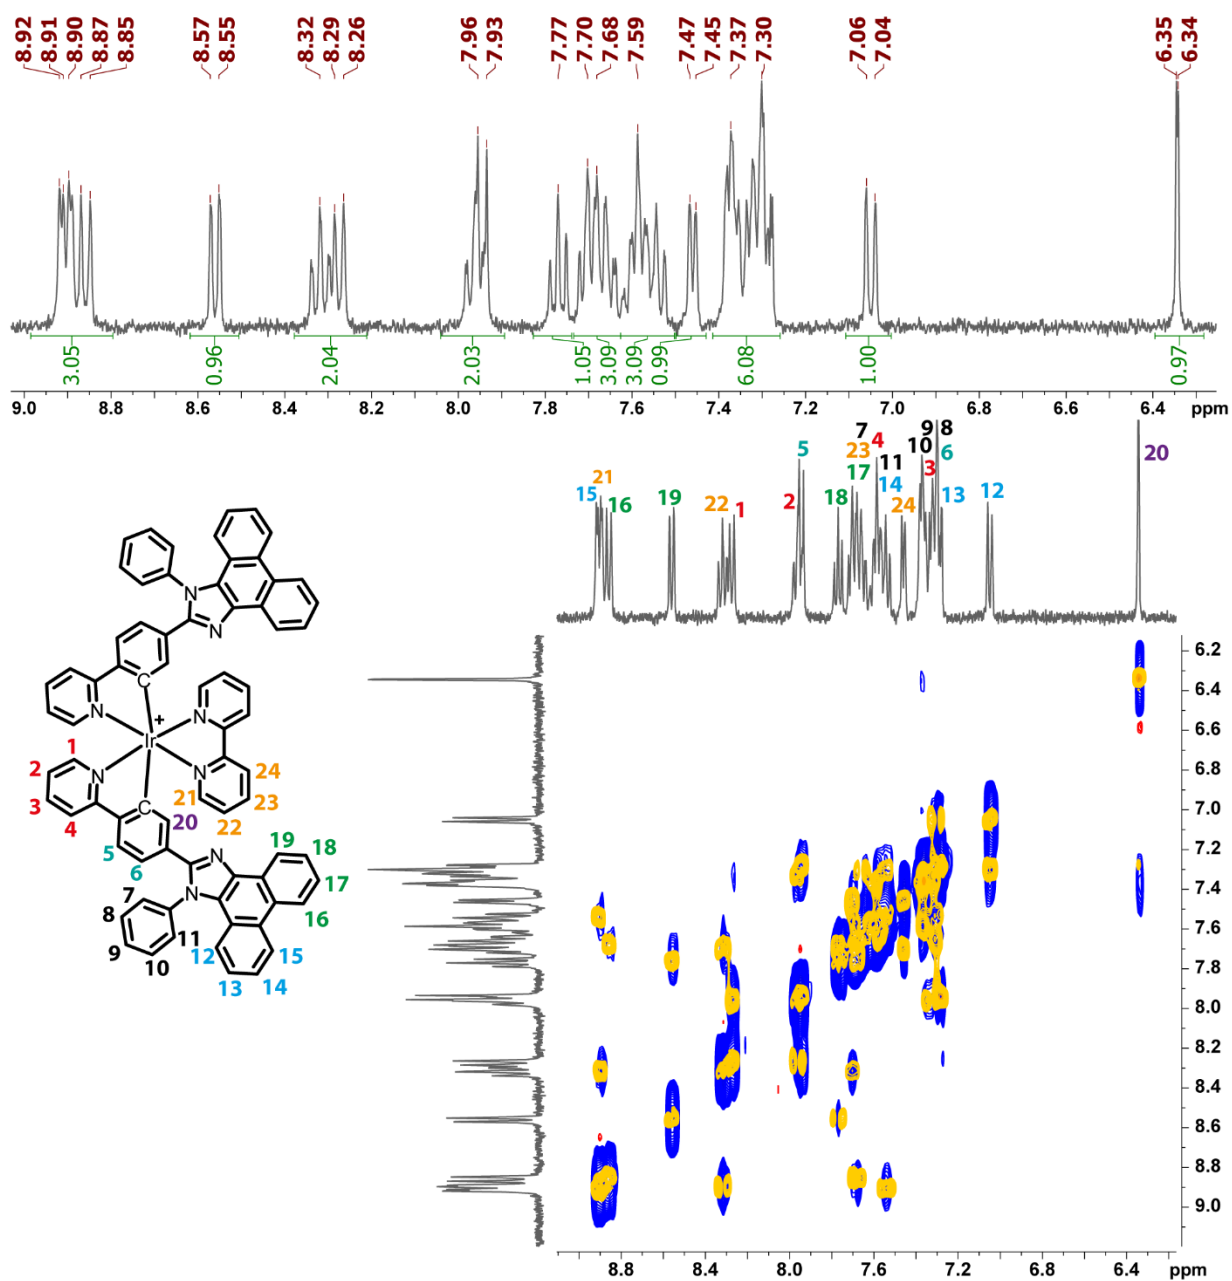

Figure S5.  $^1\text{H}$  and overlapped  $^1\text{H}$ - $^1\text{H}$  COSY and NOESY NMR spectra of complex 2 with full assignment of the signals to protons, DMSO- $d_6$ , 298 K.

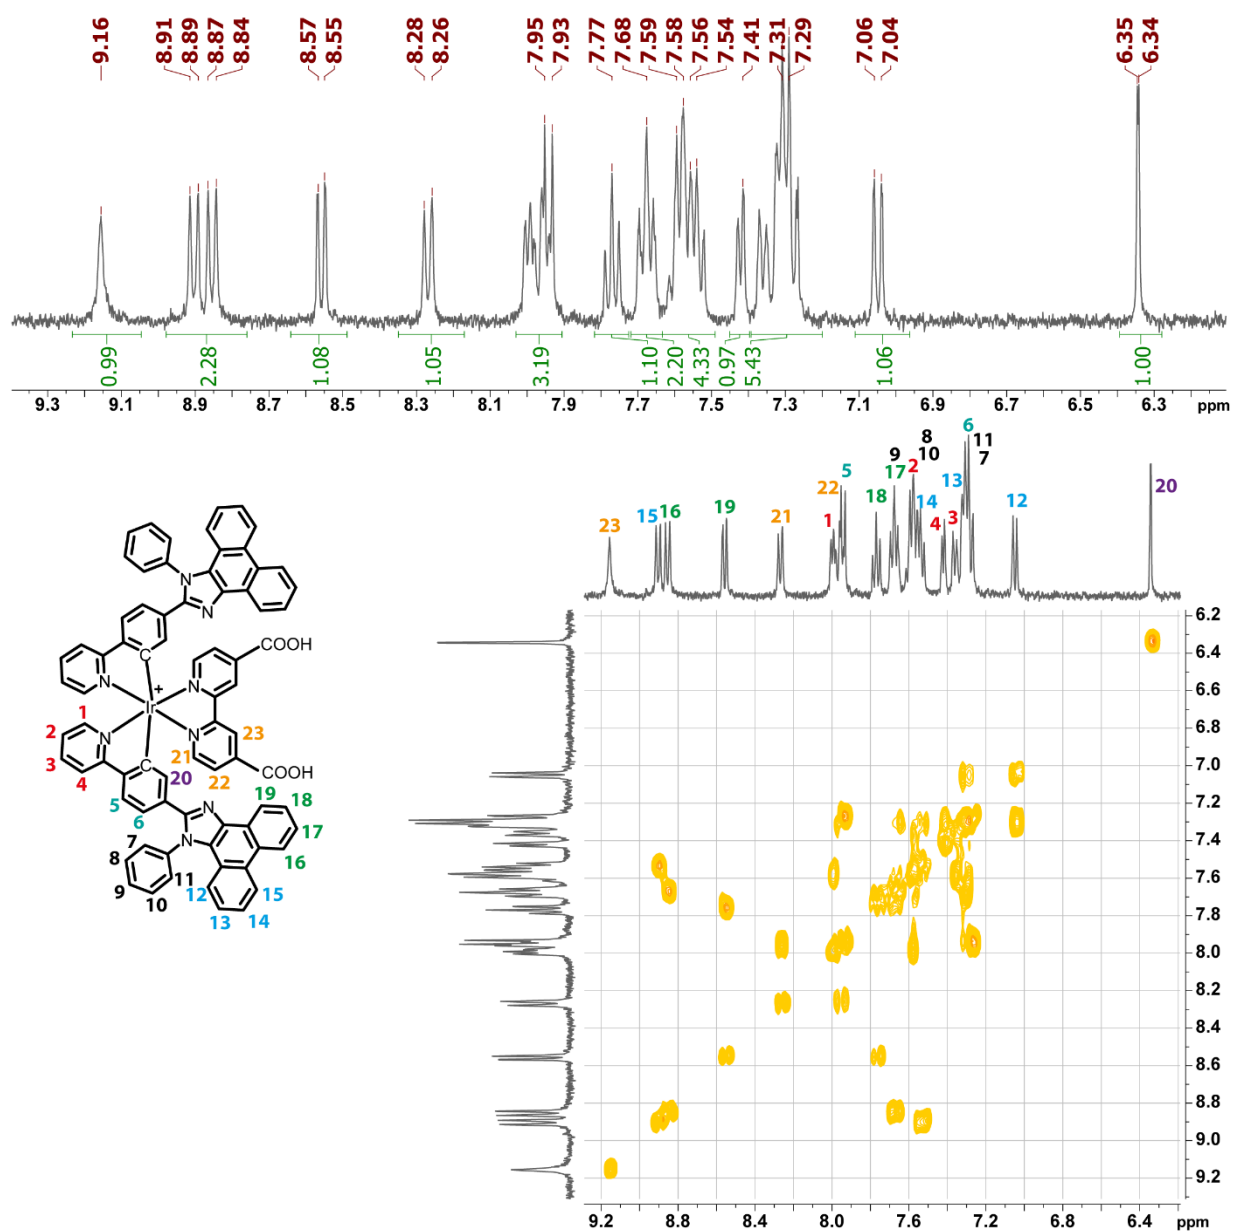

Figure S6.  $^1\text{H}$  and  $^1\text{H}$ - $^1\text{H}$  COSY NMR spectra of complex **3** with full assignment of the signals to protons, DMSO- $d_6$ , 298 K.

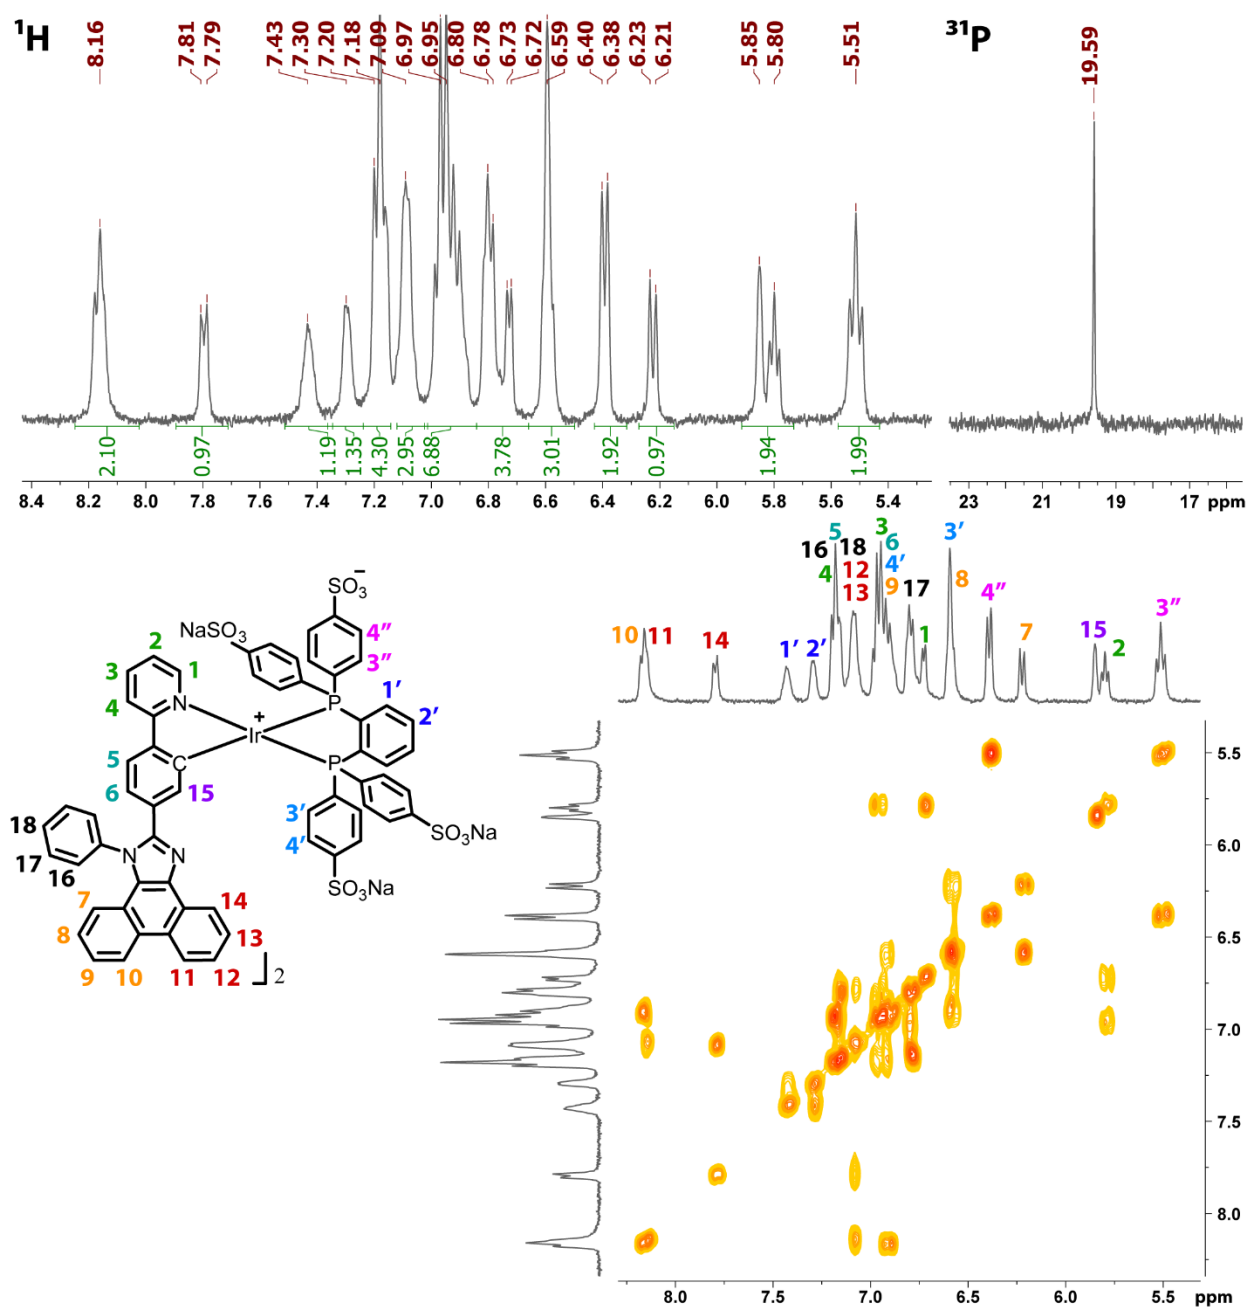

Figure S7.  $^1\text{H}$  and  $^{31}\text{P}$  NMR spectra and  $^1\text{H}$ - $^1\text{H}$  COSY NMR spectra of complex **4** with full assignment of the signals to protons, DMSO- $d_6$ , 298 K.



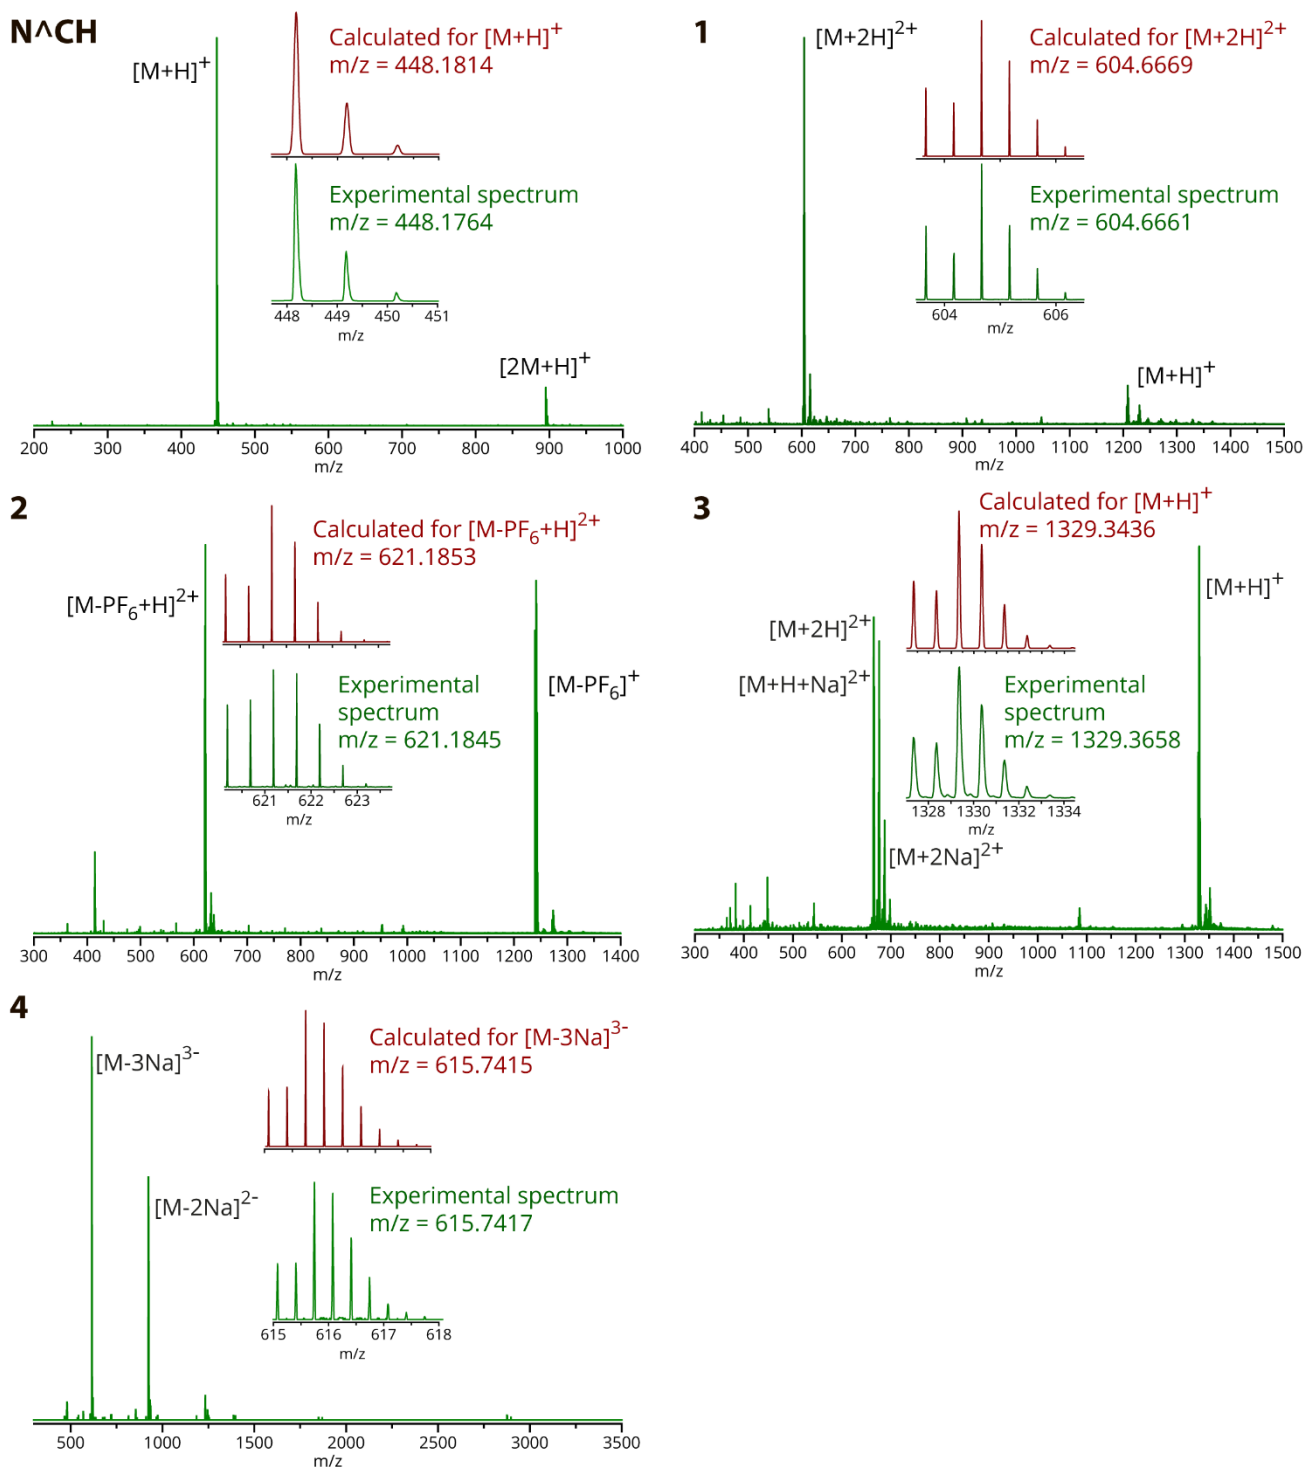

Figure S8. Experimental and calculated ESI mass spectra of **1-4** and **N<sup>+</sup>CH**.

## Part 2. Photophysical properties of complexes 1-4 and N<sup>+</sup>CH

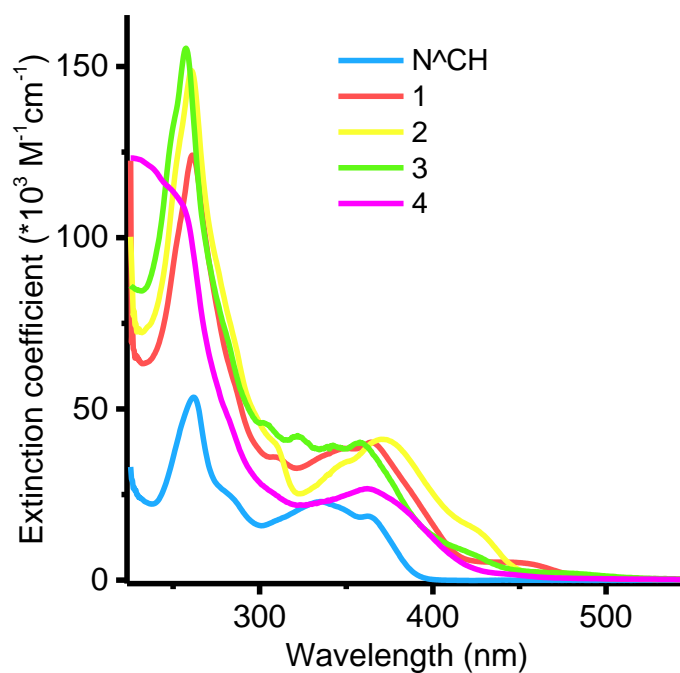

Figure S9. Absorption spectra of N<sup>+</sup>CH and complexes 1, 2 in CH<sub>2</sub>Cl<sub>2</sub>, 3 in CH<sub>3</sub>OH, and 4 in water, 298 K.

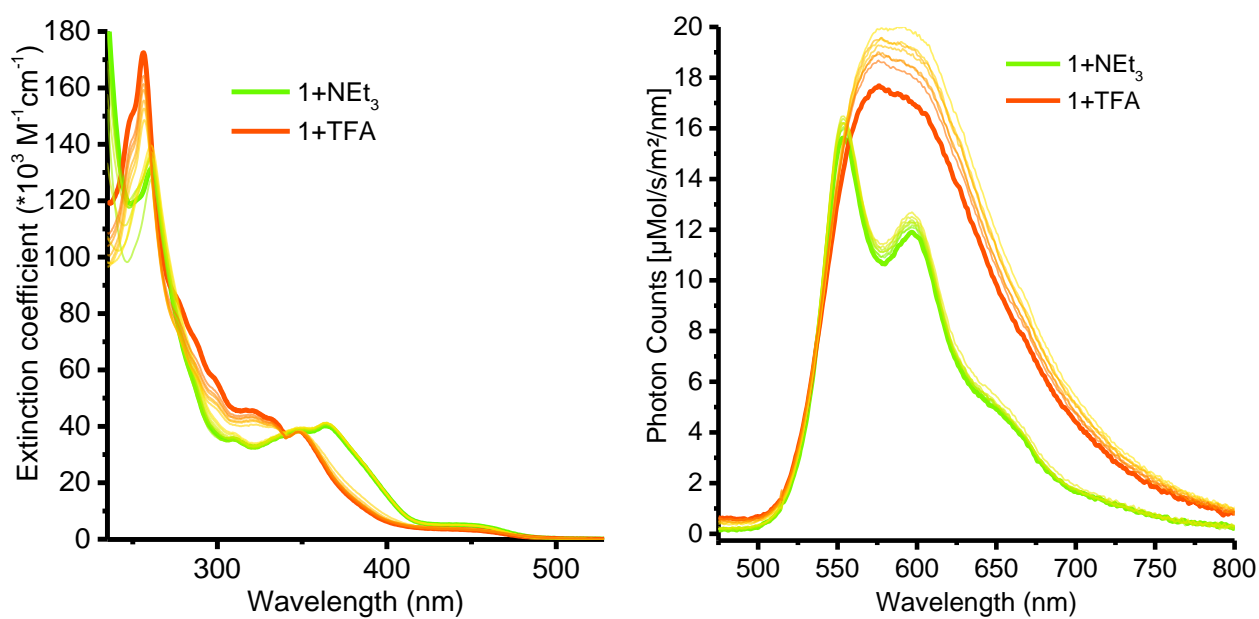

Figure S10. Absorption (left) and emission (right) spectra of complex 1 in CH<sub>2</sub>Cl<sub>2</sub> upon addition of base (NEt<sub>3</sub>, green) or acid (TFA, red), 298 K.

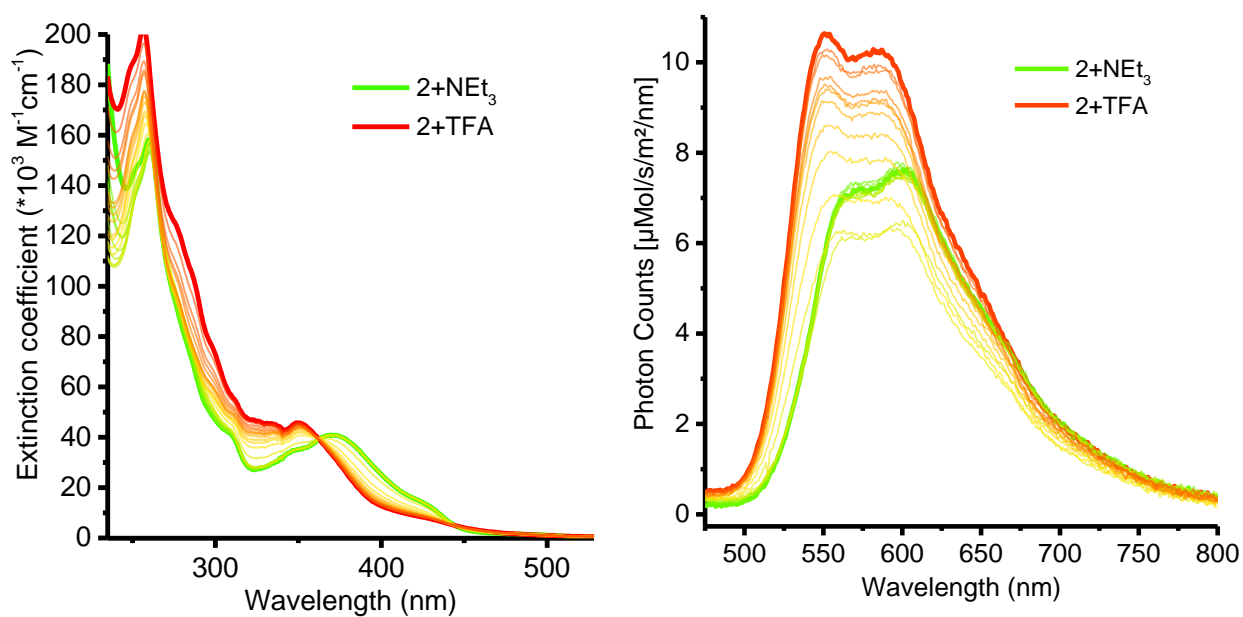

Figure S11. Absorption (left) and emission (right) spectra of complex 2 in  $\text{CH}_2\text{Cl}_2$  upon addition of base ( $\text{NEt}_3$ , green) or acid (TFA, red), 298 K.

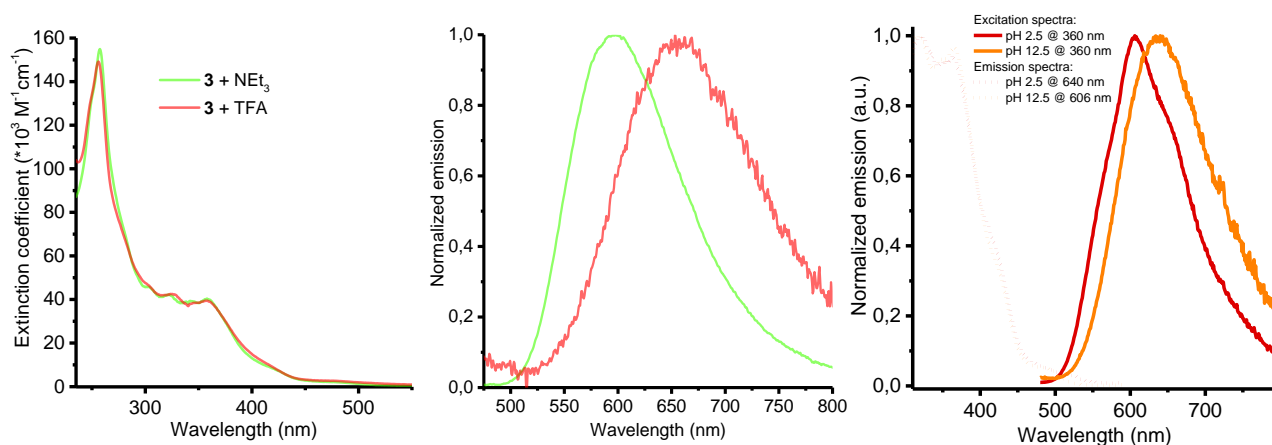

Figure S12. Absorption (left) and emission (center) spectra of complex 3 in MeOH upon addition of base ( $\text{NEt}_3$ , green) or acid (TFA, red). Right: excitation (dashed) and emission (solid) spectra of complex 3 in aqueous buffer solutions at pH 2.5 and 12.5, 298 K, aerated solutions.

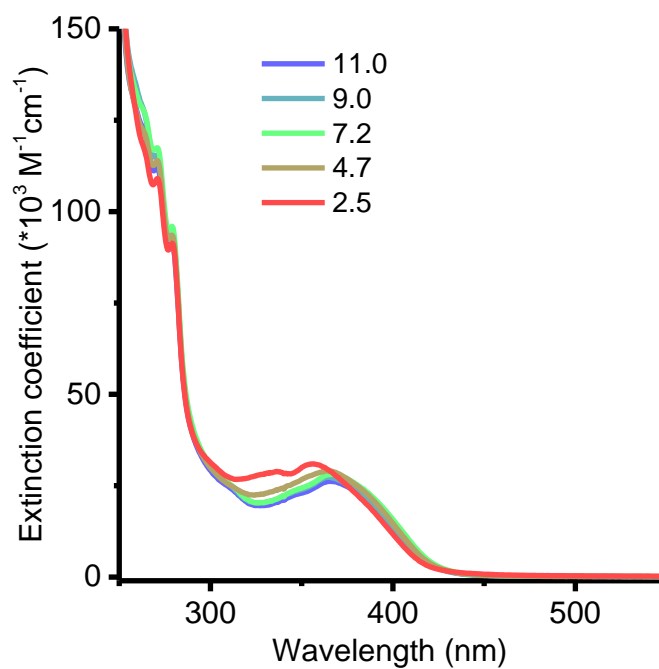

Figure S13. Absorption spectra of **4** in aqueous buffer solutions with different pH, 298 K.

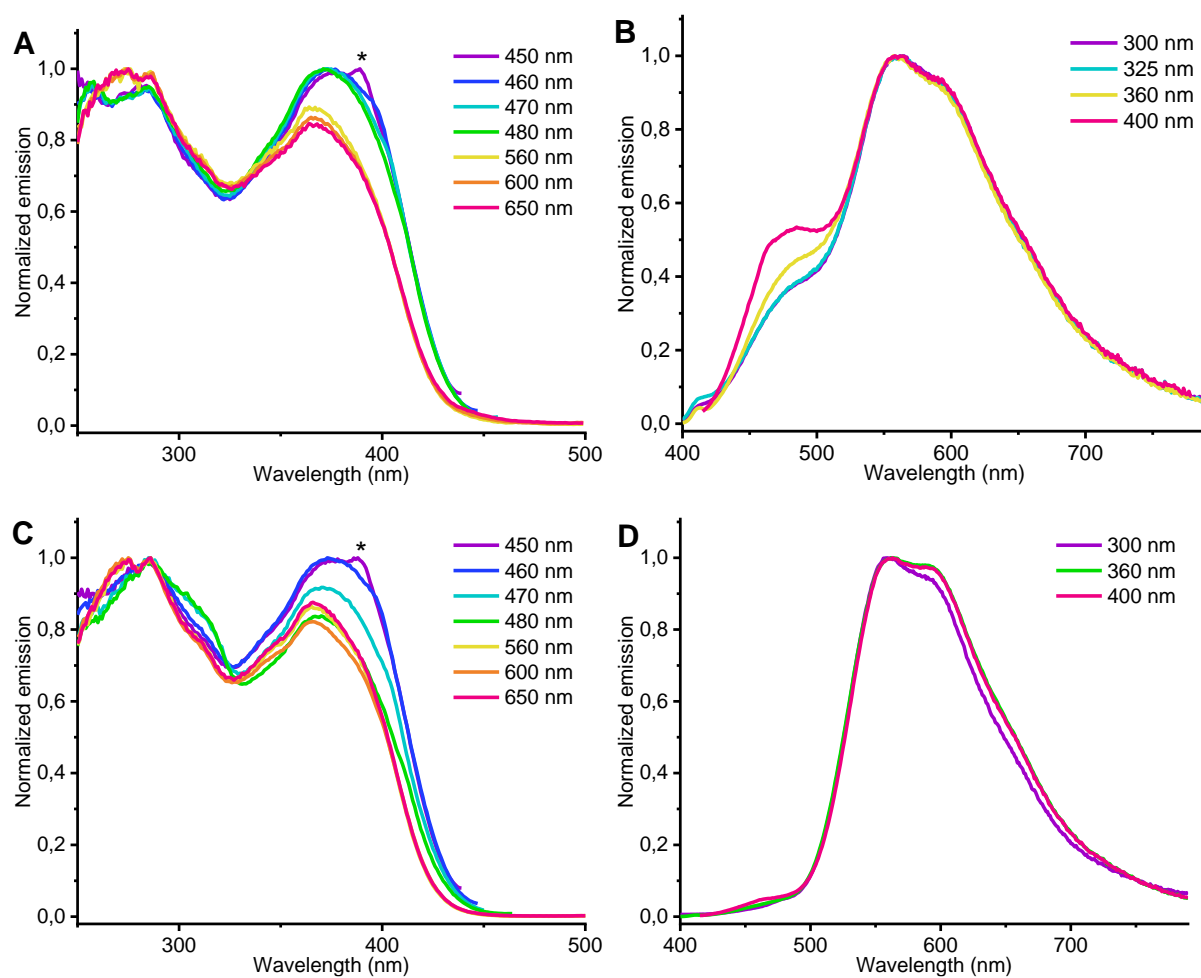

Figure S14. Excitation (A, C) and emission (B, D) spectra of **4** in 0.1 M NaOH aqueous air-saturated (A, B) and Ar-saturated (C, D) solutions, 298 K. The asterisks denote the Raman peak of water.

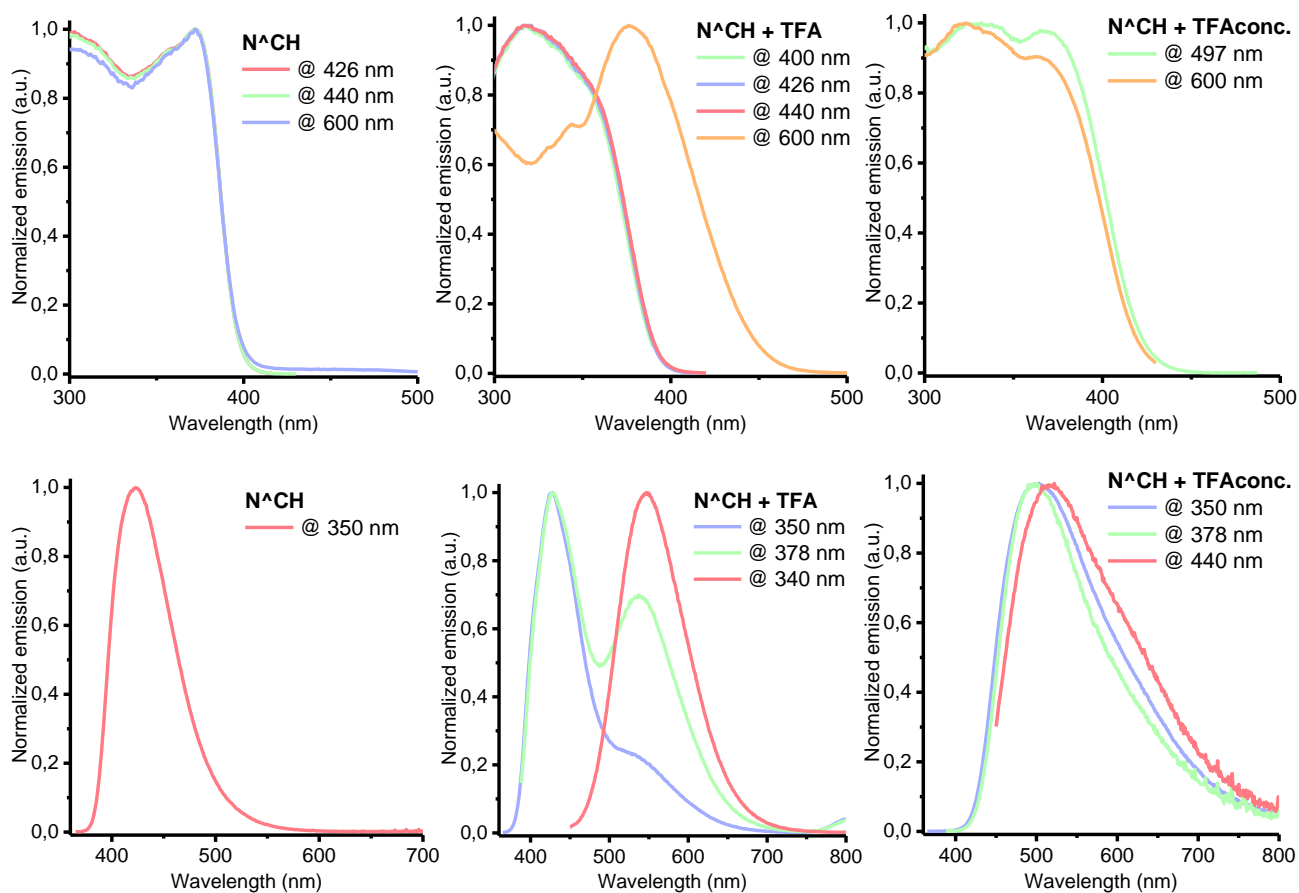

Figure S15. Excitation (top) and emission (bottom) spectra of  $N^CH$  in  $CH_2Cl_2$  upon addition of TFA, 298 K.

### Part 3. Computational results

Table S2. Experimental and calculated photophysical properties of **N<sup>+</sup>CH** and complexes **1** and **2** in CH<sub>2</sub>Cl<sub>2</sub>, complex **3** in CH<sub>3</sub>OH, and complex **4** in water.

| Complex                       | Abs, nm<br>( $\epsilon \cdot 10^{-4}$ , L $\cdot$ mol $^{-1} \cdot$ cm $^{-1}$ ) |                                                                     | $\lambda_{em}$ , nm |      |
|-------------------------------|----------------------------------------------------------------------------------|---------------------------------------------------------------------|---------------------|------|
|                               | exp                                                                              | calc                                                                | exp                 | calc |
| <b>1</b>                      | 261 (124), 308sh (36), 350sh (38), 364 (40), 450sh (5)                           | 255 (139), 288sh (65), 373 (55), 427sh (19)                         | 554, 597, 650sh     | 534  |
| { <b>1</b> +2H <sup>+</sup> } | 256, 277sh, 298sh, 320sh, 333sh, 348, 450sh                                      | 250 (121), 279sh (68), 357 (75), 437sh (15)                         | 590                 | 559  |
| <b>2</b>                      | 260 (149), 309sh (40), 350sh (34), 370 (41), 425sh (15)                          | 255 (172), 288sh (75), 320sh (35), 395 (50)                         | 570, 600, 650sh     | 517  |
| { <b>2</b> +2H <sup>+</sup> } | 257, 275sh, 300sh, 310sh, 335sh, 350sh, 425sh                                    | 249 (151), 275sh (86), 293sh (67), 364 (73), 408sh (25)             | 550, 585, 640sh     | 484  |
| <b>4</b>                      | 264sh (122), 270 (112), 279 (91), 308sh (25), 366 (26)                           | 254 (186), 296sh (46), 317sh (31), 393 (72)                         | 482sh, 555, 587sh   | 531  |
| { <b>4</b> +2H <sup>+</sup> } | 264sh (117), 271 (110), 279 (91), 356 (31)                                       | 250 (148), 284 (60), 373 (69)                                       | 563                 | 536  |
| { <b>3</b> -2H <sup>+</sup> } | 258 (155), 304 (45), 322 (42), 342 (39), 357 (40), 420sh (8), 480sh (2)          | 253 (194), 288sh (72), 335sh (30), 357sh (46), 373 (61), 401sh (36) | 595                 | 466  |
| { <b>3</b> +2H <sup>+</sup> } | 255 (148), 301sh (47), 325 (42), 357 (40), 420sh (9), 480sh (2)                  | 250 (126), 287 (74), 359 (71)                                       | 650                 | 556  |
| <b>N<sup>+</sup>CH</b>        | 262 (53), 280 (25), 335 (23), 363 (19)                                           | 254 (59), 268 (55), 291sh (25), 352 (56)                            | 423                 | 406  |

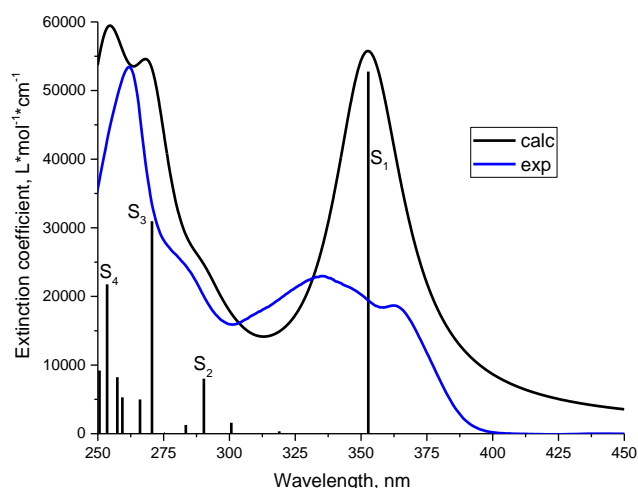

Figure S16. Absorption spectra of  $N^{\text{CH}}$  in  $\text{CH}_2\text{Cl}_2$  solution: experimental (blue) and calculated (black) lines with oscillator strengths of electronic transitions (bars).

Table S3. Experimental and calculated absorption maxima ( $\lambda$ ), extinction coefficients ( $\epsilon$ ), oscillator strengths ( $f$ ) of  $N^{\text{CH}}$ .

| $\lambda_{\text{abs, nm}}$<br>(exp) | $\epsilon \cdot 10^{-3}$ ,<br>$\text{L} \cdot \text{mol}^{-1} \cdot \text{cm}^{-1}$<br>(exp) | Transitions   | $\lambda_{\text{abs, nm}}$<br>(calc) | $f$<br>(calc) | Contribution of main NTO pair in<br>transition (%) |
|-------------------------------------|----------------------------------------------------------------------------------------------|---------------|--------------------------------------|---------------|----------------------------------------------------|
| 261                                 | 53                                                                                           | $S_0$ - $S_4$ | 254                                  | 0.38          | 43                                                 |
|                                     |                                                                                              | $S_0$ - $S_3$ | 271                                  | 0.55          | 85                                                 |
| 284sh                               | 24                                                                                           | $S_0$ - $S_2$ | 290                                  | 0.14          | 52                                                 |
| 335                                 | 23                                                                                           | $S_0$ - $S_1$ | 353                                  | 0.93          | 97                                                 |

Table S4 The decrease (blue) and increase (red) in electron density for most intensive electronic absorption transitions of  $N^{\text{CH}}$ . The data for the corresponding interfragment charge transfer (IFCT) are given below the figures. Diagonal values represent intraligand transitions, off-diagonal values represent a charge transfer from “Donor” to “Acceptor”. Fragments: PhPy – 2-phenylpyridine, Im – imidazole ring, phen – phenanthrene, Ph – phenyl ring.

| <p style="text-align: center;"><math>S_0 \rightarrow S_1</math></p> <table border="1"> <thead> <tr> <th>Donor</th><th colspan="4">Acceptor</th></tr> <tr> <th></th><th>PhPy</th><th>Im</th><th>Ph</th><th>phen</th></tr> </thead> <tbody> <tr> <td>PhPy</td><td>0.119</td><td>0.024</td><td>0.002</td><td>0.016</td></tr> <tr> <td>Im</td><td>0.310</td><td>0.062</td><td>0.006</td><td>0.041</td></tr> <tr> <td>Ph</td><td>0.004</td><td>0.001</td><td>0.000</td><td>0.001</td></tr> <tr> <td>phen</td><td>0.307</td><td>0.062</td><td>0.005</td><td>0.041</td></tr> </tbody> </table> |          |       |       |       | Donor | Acceptor |  |  |  |  | PhPy | Im | Ph | phen | PhPy | 0.119 | 0.024 | 0.002 | 0.016 | Im | 0.310 | 0.062 | 0.006 | 0.041 | Ph | 0.004 | 0.001 | 0.000 | 0.001 | phen | 0.307 | 0.062 | 0.005 | 0.041 |
|-----------------------------------------------------------------------------------------------------------------------------------------------------------------------------------------------------------------------------------------------------------------------------------------------------------------------------------------------------------------------------------------------------------------------------------------------------------------------------------------------------------------------------------------------------------------------------------------|----------|-------|-------|-------|-------|----------|--|--|--|--|------|----|----|------|------|-------|-------|-------|-------|----|-------|-------|-------|-------|----|-------|-------|-------|-------|------|-------|-------|-------|-------|
| Donor                                                                                                                                                                                                                                                                                                                                                                                                                                                                                                                                                                                   | Acceptor |       |       |       |       |          |  |  |  |  |      |    |    |      |      |       |       |       |       |    |       |       |       |       |    |       |       |       |       |      |       |       |       |       |
|                                                                                                                                                                                                                                                                                                                                                                                                                                                                                                                                                                                         | PhPy     | Im    | Ph    | phen  |       |          |  |  |  |  |      |    |    |      |      |       |       |       |       |    |       |       |       |       |    |       |       |       |       |      |       |       |       |       |
| PhPy                                                                                                                                                                                                                                                                                                                                                                                                                                                                                                                                                                                    | 0.119    | 0.024 | 0.002 | 0.016 |       |          |  |  |  |  |      |    |    |      |      |       |       |       |       |    |       |       |       |       |    |       |       |       |       |      |       |       |       |       |
| Im                                                                                                                                                                                                                                                                                                                                                                                                                                                                                                                                                                                      | 0.310    | 0.062 | 0.006 | 0.041 |       |          |  |  |  |  |      |    |    |      |      |       |       |       |       |    |       |       |       |       |    |       |       |       |       |      |       |       |       |       |
| Ph                                                                                                                                                                                                                                                                                                                                                                                                                                                                                                                                                                                      | 0.004    | 0.001 | 0.000 | 0.001 |       |          |  |  |  |  |      |    |    |      |      |       |       |       |       |    |       |       |       |       |    |       |       |       |       |      |       |       |       |       |
| phen                                                                                                                                                                                                                                                                                                                                                                                                                                                                                                                                                                                    | 0.307    | 0.062 | 0.005 | 0.041 |       |          |  |  |  |  |      |    |    |      |      |       |       |       |       |    |       |       |       |       |    |       |       |       |       |      |       |       |       |       |
| <p style="text-align: center;"><math>S_0 \rightarrow S_2</math></p> <table border="1"> <thead> <tr> <th>Donor</th><th colspan="4">Acceptor</th></tr> <tr> <th></th><th>PhPy</th><th>Im</th><th>Ph</th><th>phen</th></tr> </thead> <tbody> <tr> <td>PhPy</td><td>0.036</td><td>0.009</td><td>0.022</td><td>0.009</td></tr> <tr> <td>Im</td><td>0.107</td><td>0.027</td><td>0.067</td><td>0.026</td></tr> <tr> <td>Ph</td><td>0.003</td><td>0.001</td><td>0.002</td><td>0.001</td></tr> <tr> <td>phen</td><td>0.325</td><td>0.082</td><td>0.204</td><td>0.080</td></tr> </tbody> </table> |          |       |       |       | Donor | Acceptor |  |  |  |  | PhPy | Im | Ph | phen | PhPy | 0.036 | 0.009 | 0.022 | 0.009 | Im | 0.107 | 0.027 | 0.067 | 0.026 | Ph | 0.003 | 0.001 | 0.002 | 0.001 | phen | 0.325 | 0.082 | 0.204 | 0.080 |
| Donor                                                                                                                                                                                                                                                                                                                                                                                                                                                                                                                                                                                   | Acceptor |       |       |       |       |          |  |  |  |  |      |    |    |      |      |       |       |       |       |    |       |       |       |       |    |       |       |       |       |      |       |       |       |       |
|                                                                                                                                                                                                                                                                                                                                                                                                                                                                                                                                                                                         | PhPy     | Im    | Ph    | phen  |       |          |  |  |  |  |      |    |    |      |      |       |       |       |       |    |       |       |       |       |    |       |       |       |       |      |       |       |       |       |
| PhPy                                                                                                                                                                                                                                                                                                                                                                                                                                                                                                                                                                                    | 0.036    | 0.009 | 0.022 | 0.009 |       |          |  |  |  |  |      |    |    |      |      |       |       |       |       |    |       |       |       |       |    |       |       |       |       |      |       |       |       |       |
| Im                                                                                                                                                                                                                                                                                                                                                                                                                                                                                                                                                                                      | 0.107    | 0.027 | 0.067 | 0.026 |       |          |  |  |  |  |      |    |    |      |      |       |       |       |       |    |       |       |       |       |    |       |       |       |       |      |       |       |       |       |
| Ph                                                                                                                                                                                                                                                                                                                                                                                                                                                                                                                                                                                      | 0.003    | 0.001 | 0.002 | 0.001 |       |          |  |  |  |  |      |    |    |      |      |       |       |       |       |    |       |       |       |       |    |       |       |       |       |      |       |       |       |       |
| phen                                                                                                                                                                                                                                                                                                                                                                                                                                                                                                                                                                                    | 0.325    | 0.082 | 0.204 | 0.080 |       |          |  |  |  |  |      |    |    |      |      |       |       |       |       |    |       |       |       |       |    |       |       |       |       |      |       |       |       |       |

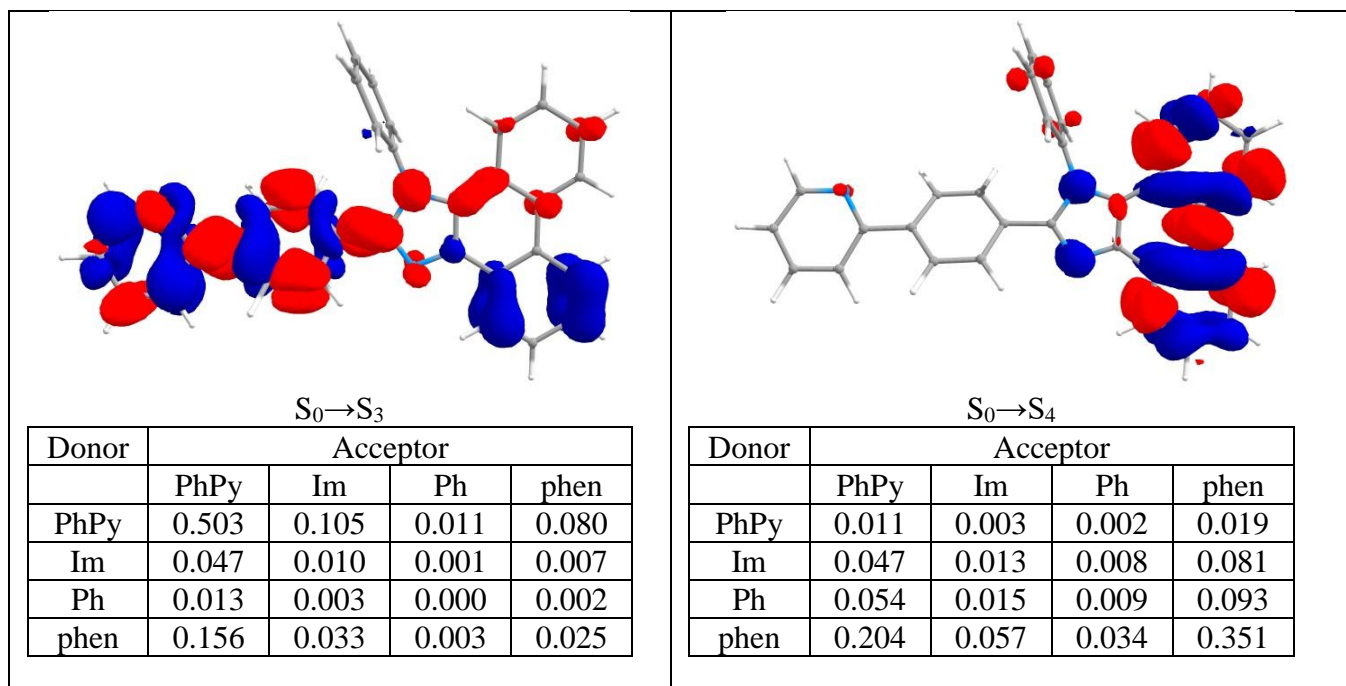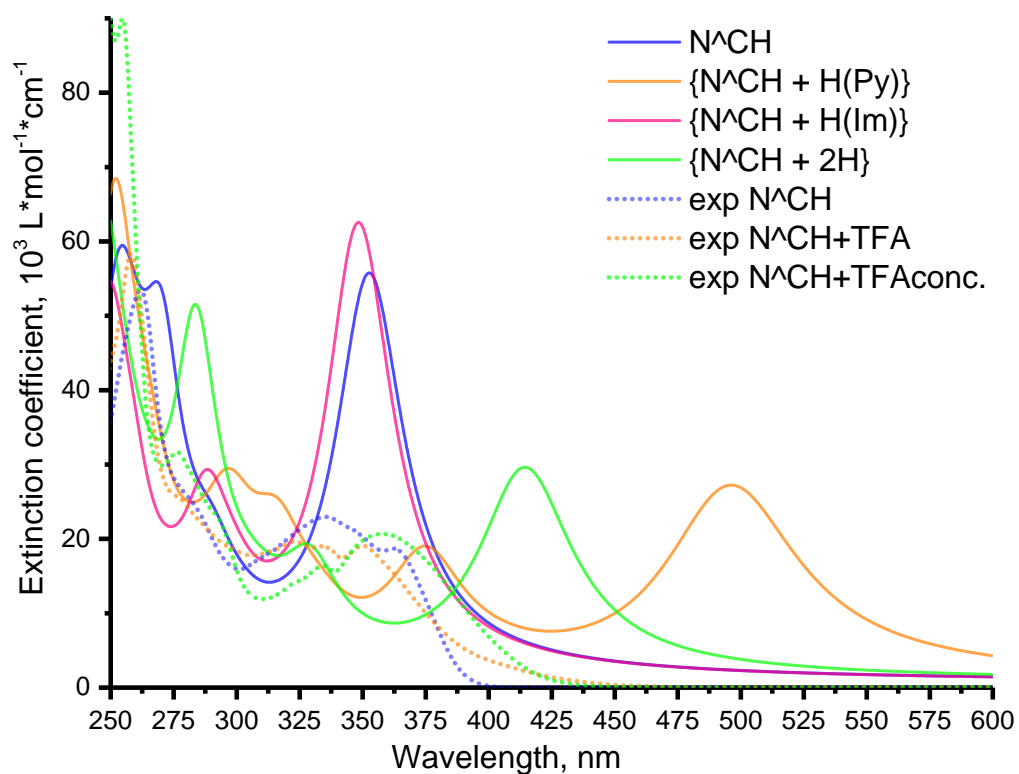

Figure S17. Experimental (dashed lines) and calculated (solid lines) absorption spectra of  $N^+CH$  and products of its protonation on pyridine  $\{N^+CH + H^+(Py)\}$ , imidazole  $\{N^+CH + H^+(Im)\}$ , and on both moieties  $\{N^+CH + 2H^+\}$  in  $CH_2Cl_2$ .



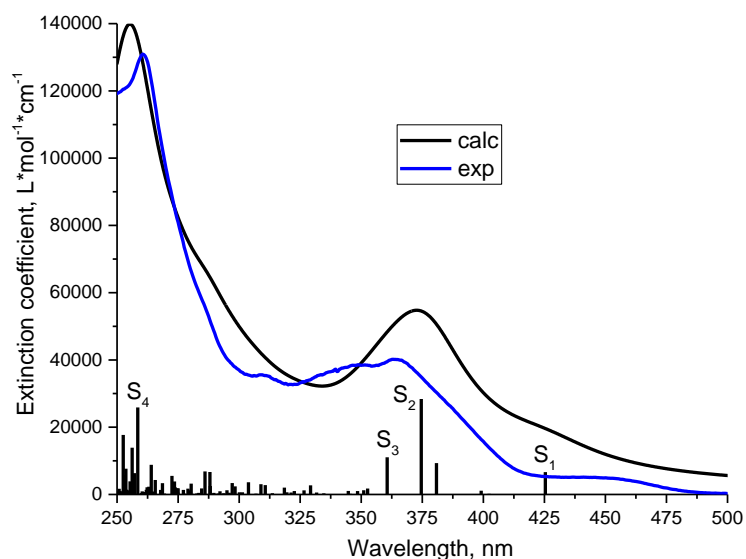

Figure S18. Absorption spectra of complex **1** in  $\text{CH}_2\text{Cl}_2$  solution: experimental (blue) and calculated (black) lines with oscillator strengths of electronic transitions (bars).

Table S5. Experimental and calculated absorption maxima ( $\lambda$ ), extinction coefficients ( $\epsilon$ ), oscillator strengths ( $f$ ) of **1**.

| Complex  | $\lambda_{\text{abs}}$ , nm (exp) | $\epsilon \cdot 10^{-3}$ , $\text{L} \cdot \text{mol}^{-1} \cdot \text{cm}^{-1}$ (exp) | Transitions             | $\lambda_{\text{abs}}$ , nm (calc) | $f$ (calc) | Contribution of main NTO pair in transition (%) |
|----------|-----------------------------------|----------------------------------------------------------------------------------------|-------------------------|------------------------------------|------------|-------------------------------------------------|
| <b>1</b> | 261                               | 124                                                                                    | $\text{S}_0\text{-S}_4$ | 258                                | 0.53       | 39                                              |
|          | 364                               | 40                                                                                     | $\text{S}_0\text{-S}_3$ | 361                                | 0.22       | 87                                              |
|          |                                   |                                                                                        | $\text{S}_0\text{-S}_2$ | 375                                | 0.58       | 90                                              |
|          | 450sh                             | 5                                                                                      | $\text{S}_0\text{-S}_1$ | 425                                | 0.14       | 95                                              |

Table S6. The decrease (blue) and increase (red) in electron density for most intensive electronic absorption transitions of **1**. The data for the corresponding interfragment charge transfer (IFCT) are given below the figures. Diagonal values represent intraligand transitions, off-diagonal values represent a charge transfer from “Donor” to “Acceptor”.

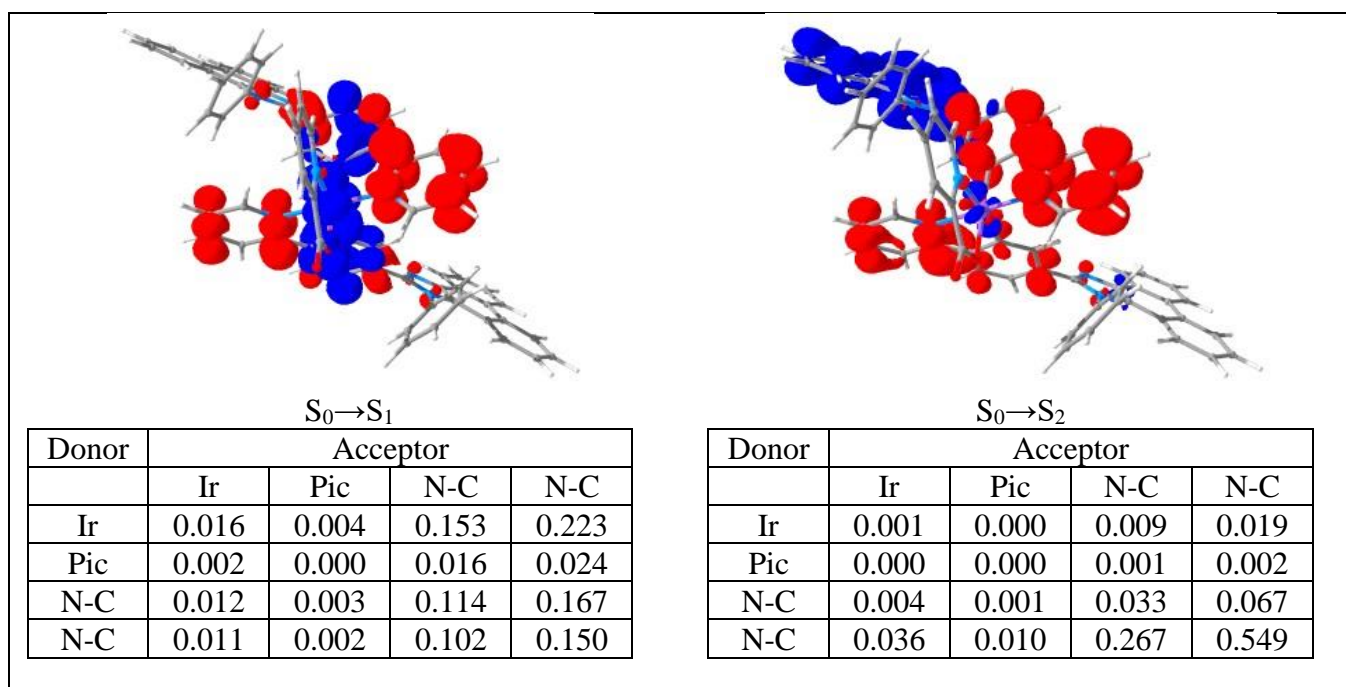

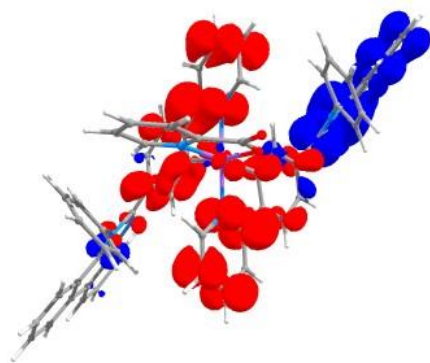

$S_0 \rightarrow S_3$

| Donor | Acceptor |       |       |       |
|-------|----------|-------|-------|-------|
|       | Ir       | Pic   | N-C   | N-C   |
| Ir    | 0.001    | 0.000 | 0.008 | 0.008 |
| Pic   | 0.000    | 0.000 | 0.001 | 0.001 |
| N-C   | 0.029    | 0.016 | 0.346 | 0.374 |
| N-C   | 0.008    | 0.005 | 0.098 | 0.106 |

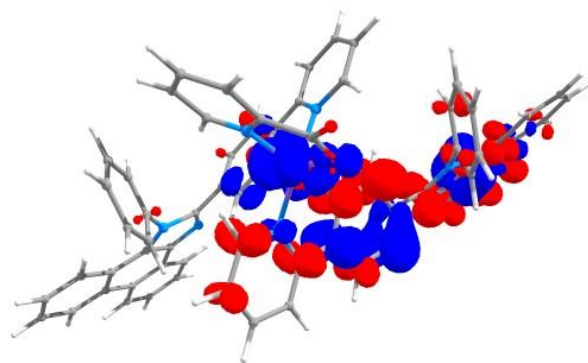

$S_0 \rightarrow S_4$

| Donor | Acceptor |       |       |       |
|-------|----------|-------|-------|-------|
|       | Ir       | Pic   | N-C   | N-C   |
| Ir    | 0.006    | 0.006 | 0.110 | 0.039 |
| Pic   | 0.001    | 0.001 | 0.012 | 0.004 |
| N-C   | 0.020    | 0.020 | 0.401 | 0.141 |
| N-C   | 0.008    | 0.008 | 0.166 | 0.058 |

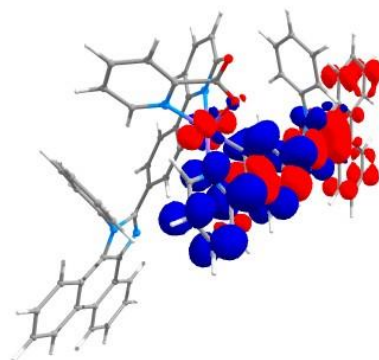

$T_1 \rightarrow S_0$

| Donor | Acceptor |       |       |       |
|-------|----------|-------|-------|-------|
|       | Ir       | Pic   | N-C   | N-C   |
| Ir    | 0.003    | 0.000 | 0.034 | 0.001 |
| Pic   | 0.001    | 0.000 | 0.007 | 0.000 |
| N-C   | 0.066    | 0.005 | 0.848 | 0.022 |
| N-C   | 0.001    | 0.000 | 0.013 | 0.000 |

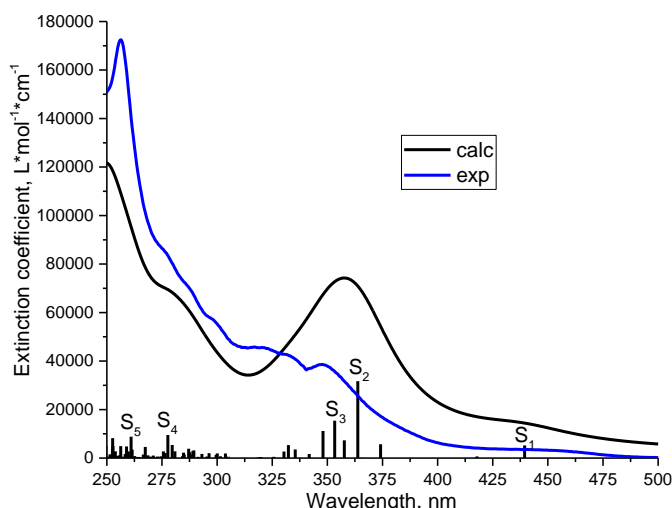

Figure S19. Absorption spectra of  $\{1+2H^+\}$  in  $CH_2Cl_2$  solution: experimental (blue) and calculated (black) lines with oscillator strengths of electronic transitions (bars).

Table S7. Table 1. Experimental and calculated absorption maxima ( $\lambda$ ), extinction coefficients ( $\epsilon$ ), oscillator strengths ( $f$ )  $\{1+2H^+\}$ .

| Complex      | $\lambda_{\text{abs}}$ , nm (exp) | $\epsilon \cdot 10^{-3}$ , $L \cdot \text{mol}^{-1} \cdot \text{cm}^{-1}$ (exp) | Transitions | $\lambda_{\text{abs}}$ , nm (calc) | $f$ (calc) | Contribution of main NTO pair in transition (%) |
|--------------|-----------------------------------|---------------------------------------------------------------------------------|-------------|------------------------------------|------------|-------------------------------------------------|
| $\{1+2H^+\}$ | 256                               | 172                                                                             | $S_0-S_5$   | 261                                | 0.18       | 28                                              |
|              | 277sh                             | 84                                                                              | $S_0-S_4$   | 278                                | 0.19       | 59                                              |
|              | 348                               | 39                                                                              | $S_0-S_3$   | 353                                | 0.31       | 63                                              |
|              |                                   |                                                                                 | $S_0-S_2$   | 364                                | 0.65       | 61                                              |
|              | 450sh                             | 4                                                                               | $S_0-S_1$   | 439                                | 0.11       | 95                                              |

Table S8. The decrease (blue) and increase (red) in electron density for most intensive electronic absorption transitions of  $\{1+2H^+\}$ . The data for the corresponding interfragment charge transfer (IFCT) are given below the figures. Diagonal values represent intraligand transitions, off-diagonal values represent a charge transfer from "Donor" to "Acceptor".

| $S_0 \rightarrow S_1$ |          |       |       |       | $S_0 \rightarrow S_2$ |          |       |       |       |
|-----------------------|----------|-------|-------|-------|-----------------------|----------|-------|-------|-------|
| Donor                 | Acceptor |       |       |       | Donor                 | Acceptor |       |       |       |
|                       | Ir       | Pic   | N-C   | N-C   |                       | Ir       | Pic   | N-C   | N-C   |
| Ir                    | 0.013    | 0.001 | 0.247 | 0.157 | Ir                    | 0.007    | 0.001 | 0.157 | 0.082 |
| Pic                   | 0.002    | 0.000 | 0.030 | 0.019 | Pic                   | 0.002    | 0.000 | 0.043 | 0.023 |
| N-C                   | 0.009    | 0.001 | 0.164 | 0.104 | N-C                   | 0.017    | 0.002 | 0.401 | 0.210 |
| N-C                   | 0.008    | 0.001 | 0.151 | 0.096 | N-C                   | 0.001    | 0.000 | 0.034 | 0.018 |

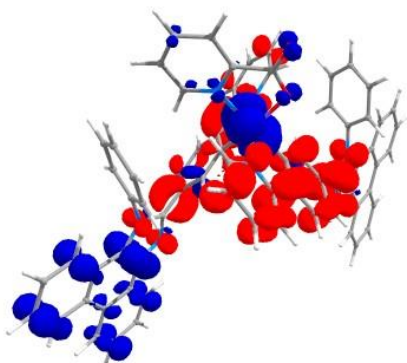
 $S_0 \rightarrow S_3$ 

| Donor | Acceptor |       |       |       |
|-------|----------|-------|-------|-------|
|       | Ir       | Pic   | N-C   | N-C   |
| Ir    | 0.012    | 0.001 | 0.214 | 0.184 |
| Pic   | 0.003    | 0.000 | 0.049 | 0.042 |
| N-C   | 0.004    | 0.000 | 0.065 | 0.056 |
| N-C   | 0.011    | 0.001 | 0.193 | 0.166 |

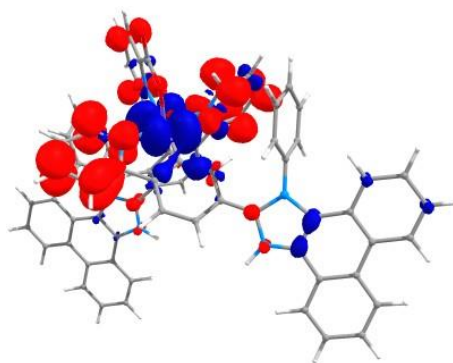
 $S_0 \rightarrow S_4$ 

| Donor | Acceptor |       |       |       |
|-------|----------|-------|-------|-------|
|       | Ir       | Pic   | N-C   | N-C   |
| Ir    | 0.010    | 0.055 | 0.210 | 0.214 |
| Pic   | 0.002    | 0.010 | 0.040 | 0.041 |
| N-C   | 0.004    | 0.023 | 0.088 | 0.089 |
| N-C   | 0.004    | 0.024 | 0.092 | 0.094 |

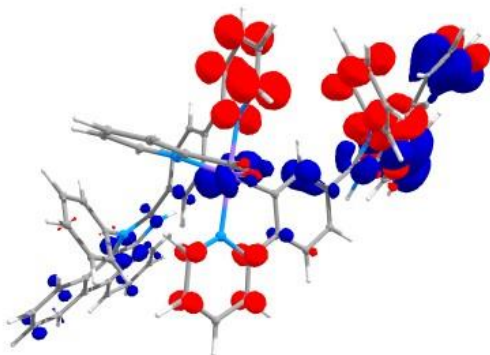
 $S_0 \rightarrow S_5$ 

| Donor | Acceptor |       |       |       |
|-------|----------|-------|-------|-------|
|       | Ir       | Pic   | N-C   | N-C   |
| Ir    | 0.002    | 0.002 | 0.073 | 0.020 |
| Pic   | 0.000    | 0.000 | 0.014 | 0.004 |
| N-C   | 0.012    | 0.012 | 0.511 | 0.141 |
| N-C   | 0.004    | 0.004 | 0.158 | 0.044 |

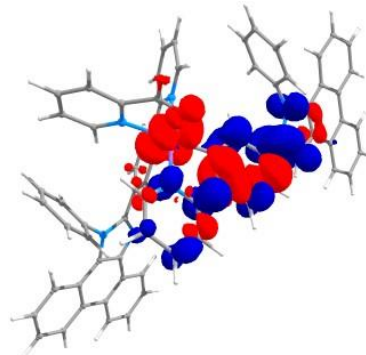
 $T_1 \rightarrow S_0$ 

| Donor | Acceptor |       |       |       |
|-------|----------|-------|-------|-------|
|       | Ir       | Pic   | N-C   | N-C   |
| Ir    | 0.007    | 0.001 | 0.020 | 0.002 |
| Pic   | 0.000    | 0.000 | 0.001 | 0.000 |
| N-C   | 0.218    | 0.032 | 0.635 | 0.049 |
| N-C   | 0.008    | 0.001 | 0.024 | 0.002 |

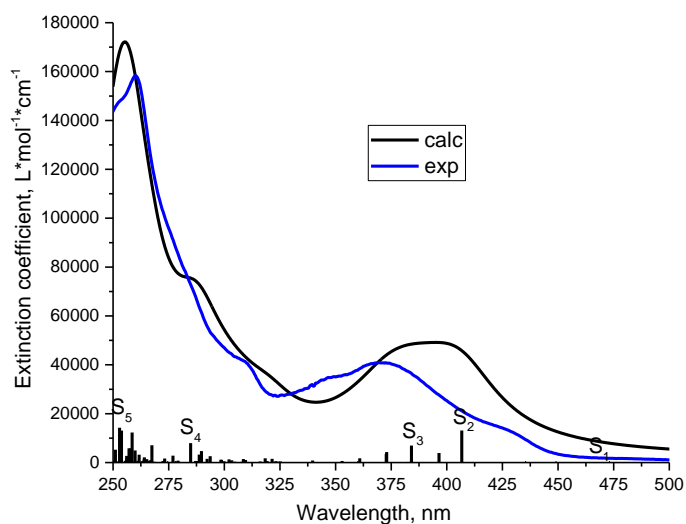

Figure S20. Absorption spectra of complex **2** in  $\text{CH}_2\text{Cl}_2$  solution: experimental (blue) and calculated (black) lines with oscillator strengths of electronic transitions (bars).

Table S9. Experimental and calculated absorption maxima ( $\lambda$ ), extinction coefficients ( $\epsilon$ ), oscillator strengths ( $f$ ) of **2**.

| Complex  | $\lambda_{\text{abs}}$ , nm (exp) | $\epsilon \cdot 10^{-3}$ , $\text{L} \cdot \text{mol}^{-1} \cdot \text{cm}^{-1}$ (exp) | Transitions             | $\lambda_{\text{abs}}$ , nm (calc) | $f$ (calc) | Contribution of main NTO pair in transition (%) |
|----------|-----------------------------------|----------------------------------------------------------------------------------------|-------------------------|------------------------------------|------------|-------------------------------------------------|
| <b>2</b> | 260                               | 149                                                                                    | $\text{S}_0\text{-S}_5$ | 253                                | 0.48       | 35                                              |
|          | 309sh                             | 40                                                                                     | $\text{S}_0\text{-S}_4$ | 285                                | 0.27       | 45                                              |
|          | 370                               | 41                                                                                     | $\text{S}_0\text{-S}_3$ | 384                                | 0.24       | 92                                              |
|          | 425sh                             | 15                                                                                     | $\text{S}_0\text{-S}_2$ | 407                                | 0.44       | 97                                              |
|          |                                   |                                                                                        | $\text{S}_0\text{-S}_1$ | 473                                | 0          | 99                                              |

Table S10. The decrease (blue) and increase (red) in electron density for most intensive electronic absorption transitions of **2**. The data for the corresponding interfragment charge transfer (IFCT) are given below the figures. Diagonal values represent intraligand transitions, off-diagonal values represent a charge transfer from “Donor” to “Acceptor”.

| $\text{S}_0 \rightarrow \text{S}_1$ |          |       |       |       | $\text{S}_0 \rightarrow \text{S}_2$ |          |       |       |       |
|-------------------------------------|----------|-------|-------|-------|-------------------------------------|----------|-------|-------|-------|
| Donor                               | Acceptor |       |       |       | Donor                               | Acceptor |       |       |       |
|                                     | Ir       | NN    | N-C   | N-C   |                                     | Ir       | NN    | N-C   | N-C   |
| Ir                                  | 0.009    | 0.244 | 0.001 | 0.001 | Ir                                  | 0.008    | 0.001 | 0.086 | 0.086 |
| NN                                  | 0.001    | 0.015 | 0.000 | 0.000 | NN                                  | 0.001    | 0.000 | 0.006 | 0.006 |
| N-C                                 | 0.013    | 0.348 | 0.002 | 0.002 | N-C                                 | 0.018    | 0.002 | 0.191 | 0.191 |
| N-C                                 | 0.013    | 0.349 | 0.002 | 0.002 | N-C                                 | 0.018    | 0.002 | 0.192 | 0.192 |

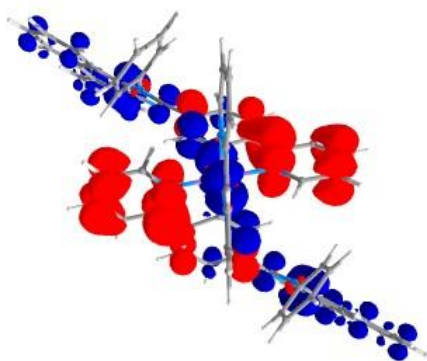
 $S_0 \rightarrow S_3$ 

| Donor | Acceptor |       |       |       |
|-------|----------|-------|-------|-------|
|       | Ir       | NN    | N-C   | N-C   |
| Ir    | 0.009    | 0.001 | 0.095 | 0.095 |
| NN    | 0.001    | 0.000 | 0.006 | 0.006 |
| N-C   | 0.018    | 0.002 | 0.187 | 0.187 |
| N-C   | 0.018    | 0.002 | 0.187 | 0.187 |

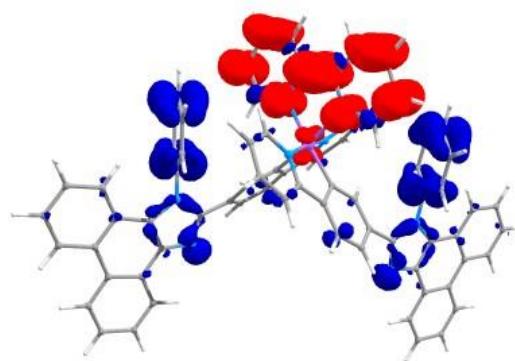
 $S_0 \rightarrow S_4$ 

| Donor | Acceptor |       |       |       |
|-------|----------|-------|-------|-------|
|       | Ir       | NN    | N-C   | N-C   |
| Ir    | 0.008    | 0.203 | 0.025 | 0.025 |
| NN    | 0.004    | 0.099 | 0.012 | 0.012 |
| N-C   | 0.009    | 0.237 | 0.030 | 0.030 |
| N-C   | 0.009    | 0.237 | 0.030 | 0.030 |

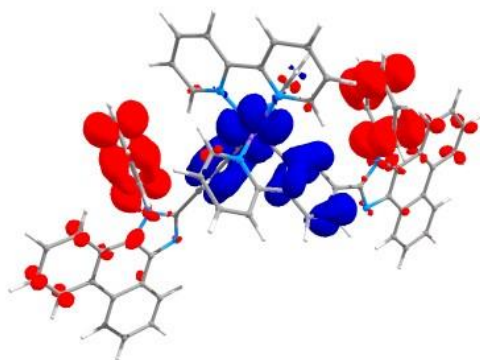
 $S_0 \rightarrow S_5$ 

| Donor | Acceptor |       |       |       |
|-------|----------|-------|-------|-------|
|       | Ir       | NN    | N-C   | N-C   |
| Ir    | 0.002    | 0.007 | 0.076 | 0.076 |
| NN    | 0.000    | 0.000 | 0.005 | 0.005 |
| N-C   | 0.005    | 0.018 | 0.196 | 0.195 |
| N-C   | 0.005    | 0.018 | 0.196 | 0.195 |

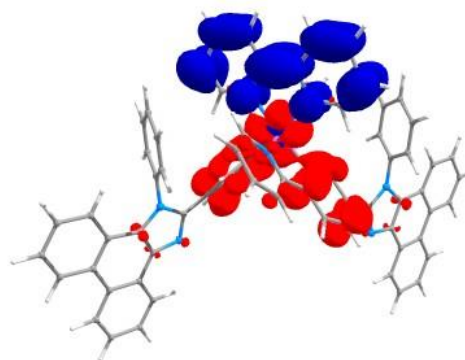
 $T_1 \rightarrow S_0$ 

| Donor | Acceptor |       |       |       |
|-------|----------|-------|-------|-------|
|       | Ir       | NN    | N-C   | N-C   |
| Ir    | 0.011    | 0.001 | 0.012 | 0.012 |
| NN    | 0.291    | 0.023 | 0.320 | 0.320 |
| N-C   | 0.001    | 0.000 | 0.002 | 0.002 |
| N-C   | 0.001    | 0.000 | 0.002 | 0.002 |



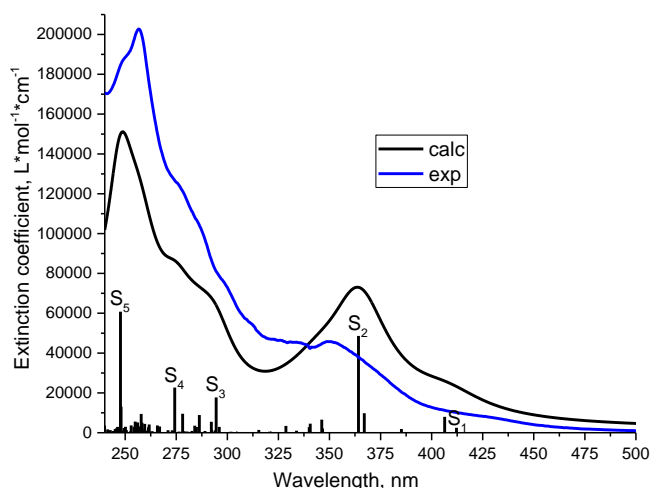

Figure S21. Absorption spectra of  $\{2+2H^+\}$  in  $CH_2Cl_2$  solution: experimental (blue) and calculated (black) lines with oscillator strengths of electronic transitions (bars).

Table S11. Experimental and calculated absorption maxima ( $\lambda$ ), extinction coefficients ( $\epsilon$ ), oscillator strengths ( $f$ )  $\{2+2H^+\}$ .

| Complex      | $\lambda_{\text{abs}}$ , nm (exp) | $\epsilon \cdot 10^{-3}$ , $L \cdot \text{mol}^{-1} \cdot \text{cm}^{-1}$ (exp) | Transitions | $\lambda_{\text{abs}}$ , nm (calc) | $f$ (calc) | Contribution of main NTO pair in transition (%) |
|--------------|-----------------------------------|---------------------------------------------------------------------------------|-------------|------------------------------------|------------|-------------------------------------------------|
| $\{2+2H^+\}$ | 257                               | 202                                                                             | $S_0-S_5$   | 248                                | 1.07       | 33                                              |
|              | 275sh                             | 124                                                                             | $S_0-S_4$   | 274                                | 0.40       | 36                                              |
|              | 300sh                             | 72                                                                              | $S_0-S_3$   | 295                                | 0.31       | 74                                              |
|              | 350                               | 46                                                                              | $S_0-S_2$   | 364                                | 0.86       | 75                                              |
|              | 425sh                             | 8                                                                               | $S_0-S_1$   | 412                                | 0.04       | 96                                              |

Table S12. The decrease (blue) and increase (red) in electron density for most intensive electronic absorption transitions of  $\{2+2H^+\}$ . The data for the corresponding interfragment charge transfer (IFCT) are given below the figures. Diagonal values represent intraligand transitions, off-diagonal values represent a charge transfer from "Donor" to "Acceptor".

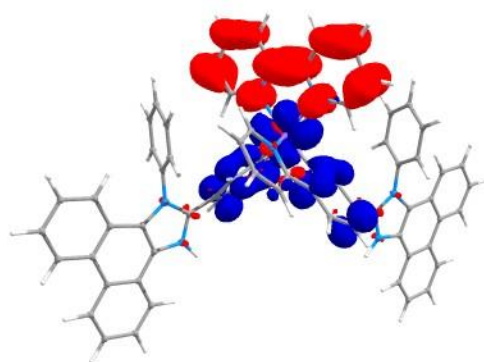

$S_0 \rightarrow S_1$

| Donor | Acceptor |       |       |       |
|-------|----------|-------|-------|-------|
|       | Ir       | NN    | N-C   | N-C   |
| Ir    | 0.019    | 0.282 | 0.046 | 0.046 |
| NN    | 0.001    | 0.017 | 0.003 | 0.003 |
| N-C   | 0.014    | 0.210 | 0.034 | 0.034 |
| N-C   | 0.014    | 0.210 | 0.034 | 0.034 |

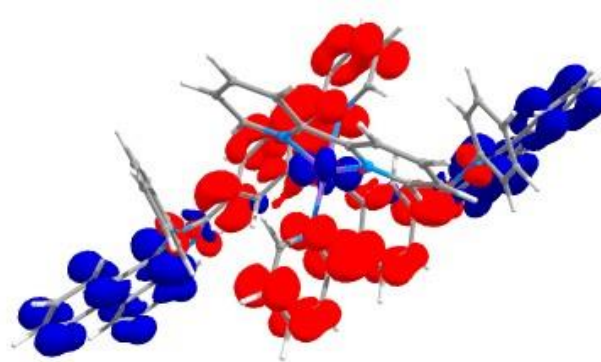

$S_0 \rightarrow S_2$

| Donor | Acceptor |       |       |       |
|-------|----------|-------|-------|-------|
|       | Ir       | NN    | N-C   | N-C   |
| Ir    | 0.001    | 0.001 | 0.020 | 0.020 |
| NN    | 0.000    | 0.000 | 0.001 | 0.001 |
| N-C   | 0.016    | 0.008 | 0.227 | 0.227 |
| N-C   | 0.016    | 0.008 | 0.227 | 0.227 |

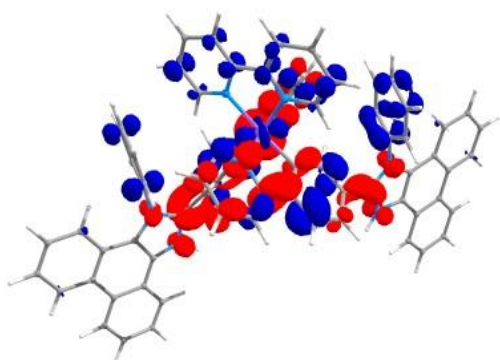
 $S_0 \rightarrow S_3$ 

| Donor | Acceptor |       |       |       |
|-------|----------|-------|-------|-------|
|       | Ir       | NN    | N-C   | N-C   |
| Ir    | 0.002    | 0.001 | 0.034 | 0.034 |
| NN    | 0.004    | 0.001 | 0.054 | 0.054 |
| N-C   | 0.013    | 0.003 | 0.196 | 0.196 |
| N-C   | 0.013    | 0.003 | 0.196 | 0.196 |

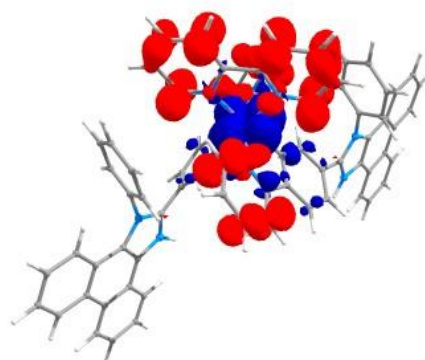
 $S_0 \rightarrow S_4$ 

| Donor | Acceptor |       |       |       |
|-------|----------|-------|-------|-------|
|       | Ir       | NN    | N-C   | N-C   |
| Ir    | 0.007    | 0.127 | 0.115 | 0.115 |
| NN    | 0.002    | 0.046 | 0.041 | 0.041 |
| N-C   | 0.005    | 0.089 | 0.080 | 0.080 |
| N-C   | 0.005    | 0.089 | 0.080 | 0.080 |

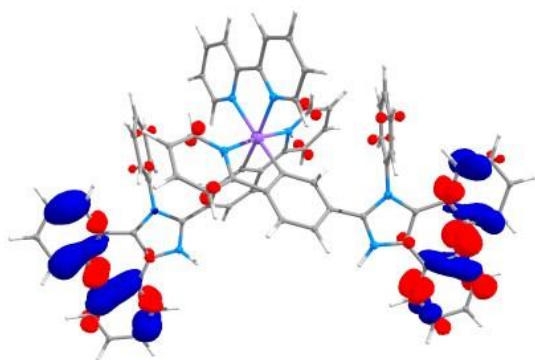
 $S_0 \rightarrow S_5$ 

| Donor | Acceptor |       |       |       |
|-------|----------|-------|-------|-------|
|       | Ir       | NN    | N-C   | N-C   |
| Ir    | 0.000    | 0.000 | 0.008 | 0.008 |
| NN    | 0.000    | 0.000 | 0.001 | 0.001 |
| N-C   | 0.001    | 0.010 | 0.240 | 0.240 |
| N-C   | 0.001    | 0.010 | 0.240 | 0.240 |

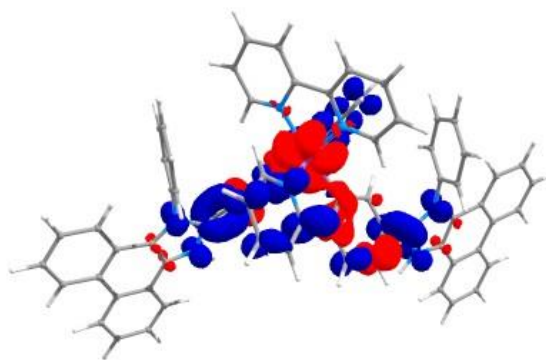
 $T_1 \rightarrow S_0$ 

| Donor | Acceptor |       |       |       |
|-------|----------|-------|-------|-------|
|       | Ir       | NN    | N-C   | N-C   |
| Ir    | 0.010    | 0.001 | 0.013 | 0.013 |
| NN    | 0.002    | 0.000 | 0.003 | 0.003 |
| N-C   | 0.126    | 0.012 | 0.169 | 0.169 |
| N-C   | 0.127    | 0.012 | 0.170 | 0.170 |



Table S13. Partial protonation of complexes **1** and **2**: left – calculated absorption spectra for complexes **1** and **2** and their mono- and di-protonated forms, central and right: the decrease (blue) and increase (red) in electron density for absorption and emission transitions in mono-protonated forms.

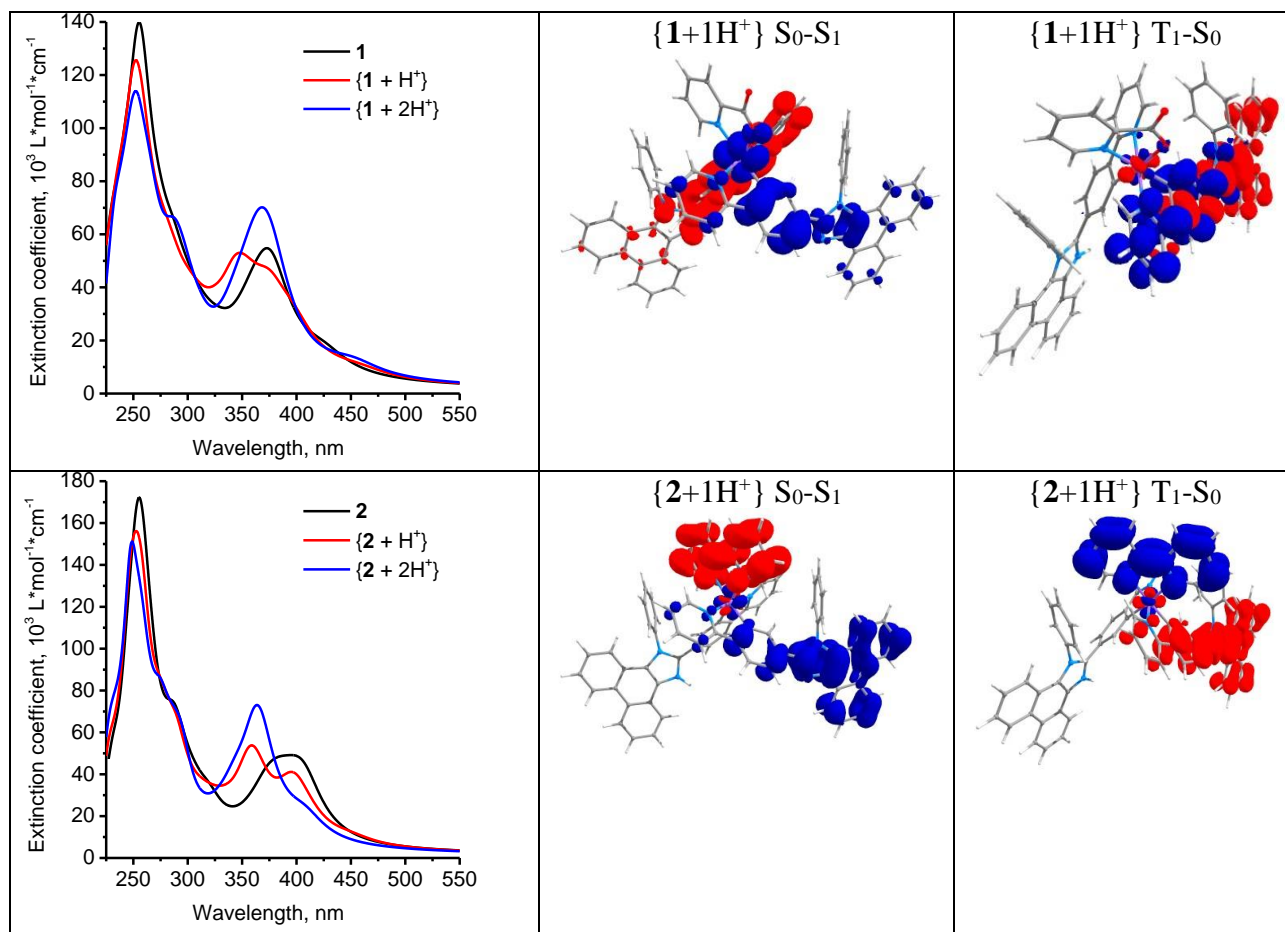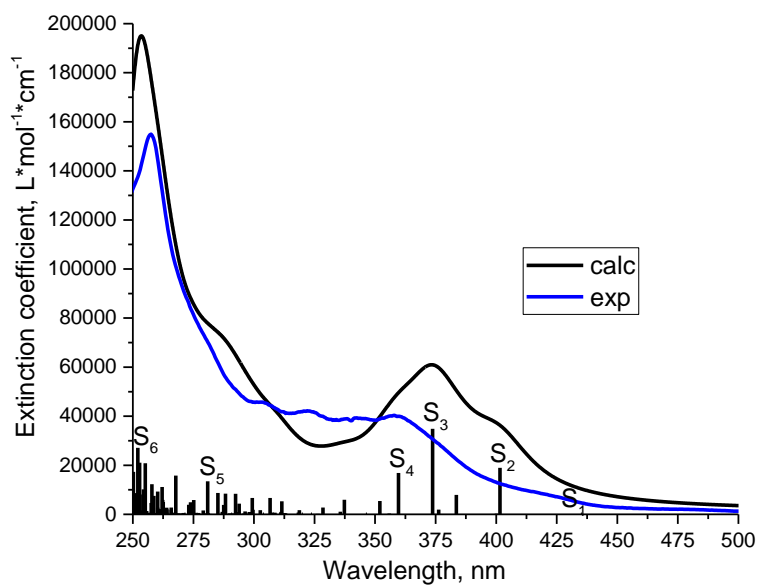

Figure S22. Absorption spectra of complex **{3-2H<sup>+</sup>}** (deprotonated at the N<sup>N</sup> ligand form of **3**) in CH<sub>3</sub>OH: experimental (blue) and calculated (black) lines with oscillator strengths of electronic transitions (bars).

Table S14. Experimental and calculated absorption maxima ( $\lambda$ ), extinction coefficients ( $\epsilon$ ), oscillator strengths ( $f$ ) {3-2H<sup>+</sup>}.

| Complex              | $\lambda_{\text{abs}}$ , nm (exp) | $\epsilon \cdot 10^{-3}$ , L $\cdot$ mol <sup>-1</sup> $\cdot$ cm <sup>-1</sup> (exp) | Transitions                    | $\lambda_{\text{abs}}$ , nm (calc) | $f$ (calc) | Contribution of main NTO pair in transition (%) |
|----------------------|-----------------------------------|---------------------------------------------------------------------------------------|--------------------------------|------------------------------------|------------|-------------------------------------------------|
| {3-2H <sup>+</sup> } | 258                               | 155                                                                                   | S <sub>0</sub> -S <sub>6</sub> | 252                                | 0.37       | 29                                              |
|                      | 304                               | 45                                                                                    | S <sub>0</sub> -S <sub>5</sub> | 281                                | 0.18       | 52                                              |
|                      | 357                               | 40                                                                                    | S <sub>0</sub> -S <sub>4</sub> | 360                                | 0.23       | 88                                              |
|                      |                                   |                                                                                       | S <sub>0</sub> -S <sub>3</sub> | 374                                | 0.47       | 90                                              |
|                      | 420sh                             | 8                                                                                     | S <sub>0</sub> -S <sub>2</sub> | 402                                | 0.26       | 95                                              |
|                      | 480sh                             | 2                                                                                     | S <sub>0</sub> -S <sub>1</sub> | 435                                | 0.00       | 98                                              |

Table S15. The decrease (blue) and increase (red) in electron density for most intensive electronic absorption transitions of {3-2H<sup>+</sup>}. The data for the corresponding interfragment charge transfer (IFCT) are given below the figures. Diagonal values represent intraligand transitions, off-diagonal values represent a charge transfer from “Donor” to “Acceptor”.

$S_0 \rightarrow S_1$

| Donor | Acceptor |       |       |       |
|-------|----------|-------|-------|-------|
|       | Ir       | NN    | N-C   | N-C   |
| Ir    | 0.013    | 0.323 | 0.002 | 0.002 |
| NN    | 0.001    | 0.021 | 0.000 | 0.000 |
| N-C   | 0.013    | 0.302 | 0.002 | 0.002 |
| N-C   | 0.013    | 0.302 | 0.002 | 0.002 |

$S_0 \rightarrow S_2$

| Donor | Acceptor |       |       |       |
|-------|----------|-------|-------|-------|
|       | Ir       | NN    | N-C   | N-C   |
| Ir    | 0.014    | 0.001 | 0.150 | 0.150 |
| NN    | 0.001    | 0.000 | 0.010 | 0.010 |
| N-C   | 0.015    | 0.001 | 0.158 | 0.158 |
| N-C   | 0.015    | 0.001 | 0.158 | 0.158 |

$S_0 \rightarrow S_3$

| Donor | Acceptor |       |       |       |
|-------|----------|-------|-------|-------|
|       | Ir       | NN    | N-C   | N-C   |
| Ir    | 0.004    | 0.000 | 0.042 | 0.042 |
| NN    | 0.000    | 0.000 | 0.003 | 0.003 |
| N-C   | 0.020    | 0.002 | 0.216 | 0.216 |
| N-C   | 0.020    | 0.002 | 0.216 | 0.216 |

$S_0 \rightarrow S_4$

| Donor | Acceptor |       |       |       |
|-------|----------|-------|-------|-------|
|       | Ir       | NN    | N-C   | N-C   |
| Ir    | 0.000    | 0.000 | 0.004 | 0.004 |
| NN    | 0.000    | 0.000 | 0.000 | 0.000 |
| N-C   | 0.021    | 0.003 | 0.236 | 0.236 |
| N-C   | 0.021    | 0.003 | 0.236 | 0.236 |

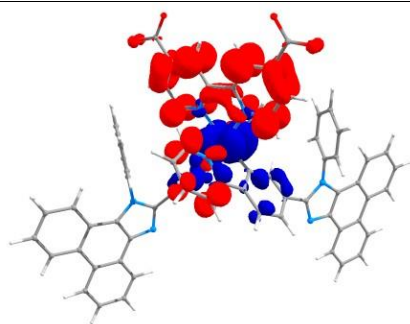
 $S_0 \rightarrow S_5$ 

| Donor | Acceptor |       |       |       |
|-------|----------|-------|-------|-------|
|       | Ir       | NN    | N-C   | N-C   |
| Ir    | 0.010    | 0.240 | 0.070 | 0.070 |
| NN    | 0.003    | 0.079 | 0.023 | 0.023 |
| N-C   | 0.006    | 0.149 | 0.043 | 0.043 |
| N-C   | 0.006    | 0.148 | 0.043 | 0.043 |

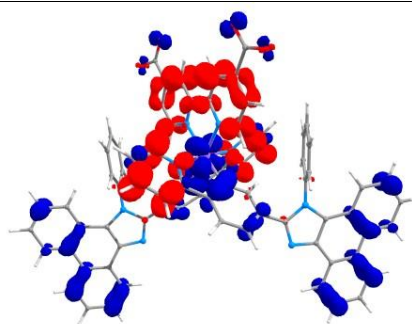
 $S_0 \rightarrow S_6$ 

| Donor | Acceptor |       |       |       |
|-------|----------|-------|-------|-------|
|       | Ir       | NN    | N-C   | N-C   |
| Ir    | 0.003    | 0.037 | 0.031 | 0.031 |
| NN    | 0.005    | 0.061 | 0.050 | 0.050 |
| N-C   | 0.011    | 0.134 | 0.110 | 0.110 |
| N-C   | 0.011    | 0.134 | 0.111 | 0.111 |

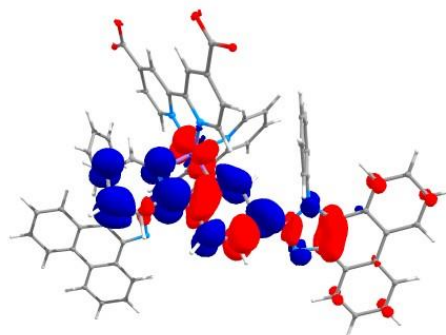
 $T_1 \rightarrow S_0$ 

| Donor | Acceptor |       |       |       |
|-------|----------|-------|-------|-------|
|       | Ir       | NN    | N-C   | N-C   |
| Ir    | 0.008    | 0.001 | 0.004 | 0.031 |
| NN    | 0.003    | 0.000 | 0.001 | 0.010 |
| N-C   | 0.008    | 0.001 | 0.004 | 0.031 |
| N-C   | 0.160    | 0.022 | 0.079 | 0.638 |

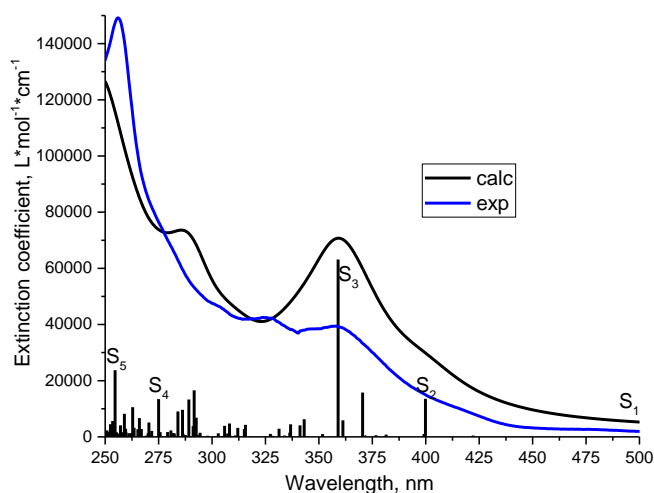

Figure S23. Absorption spectra of complex  $\{3+2H^+\}$  in  $CH_3OH$ : experimental (blue) and calculated (black) lines with oscillator strengths of electronic transitions (bars).

Table S16 Experimental and calculated absorption maxima ( $\lambda$ ), extinction coefficients ( $\epsilon$ ), oscillator strengths ( $f$ )  $\{3+2H^+\}$ .

| Complex      | $\lambda_{abs}, nm$<br>(exp) | $\epsilon \cdot 10^{-3},$<br>$L \cdot mol^{-1} \cdot cm^{-1}$<br>(exp) | Transitions | $\lambda_{abs}, nm$<br>(calc) | $f$<br>(calc) | Contribution of main<br>NTO pair in transition<br>(%) |
|--------------|------------------------------|------------------------------------------------------------------------|-------------|-------------------------------|---------------|-------------------------------------------------------|
| $\{3+2H^+\}$ | 255                          | 148                                                                    | $S_0-S_5$   | 254                           | 0.32          | 41                                                    |
|              |                              |                                                                        | $S_0-S_4$   | 275                           | 0.18          | 36                                                    |
|              | 357                          | 40                                                                     | $S_0-S_3$   | 359                           | 0.86          | 75                                                    |
|              | 420sh                        | 9                                                                      | $S_0-S_2$   | 400                           | 0.18          | 88                                                    |
|              | 480sh                        | 2                                                                      | $S_0-S_1$   | 496                           | 0.00          | 99                                                    |

Table S17. The decrease (blue) and increase (red) in electron density for most intensive electronic absorption transitions of  $\{3+2H^+\}$ . The data for the corresponding interfragment charge transfer (IFCT) are given below the figures. Diagonal values represent intraligand transitions, off-diagonal values represent a charge transfer from "Donor" to "Acceptor".

| $S_0 \rightarrow S_1$ |          |       |       |       | $S_0 \rightarrow S_2$ |          |       |       |       |
|-----------------------|----------|-------|-------|-------|-----------------------|----------|-------|-------|-------|
| Donor                 | Acceptor |       |       |       | Donor                 | Acceptor |       |       |       |
|                       | Ir       | NN    | N-C   | N-C   |                       | Ir       | NN    | N-C   | N-C   |
| Ir                    | 0.016    | 0.357 | 0.002 | 0.002 | Ir                    | 0.014    | 0.033 | 0.171 | 0.171 |
| NN                    | 0.001    | 0.022 | 0.000 | 0.000 | NN                    | 0.001    | 0.002 | 0.011 | 0.011 |
| N-C                   | 0.013    | 0.284 | 0.002 | 0.002 | N-C                   | 0.011    | 0.025 | 0.128 | 0.129 |
| N-C                   | 0.013    | 0.284 | 0.002 | 0.002 | N-C                   | 0.011    | 0.025 | 0.129 | 0.129 |

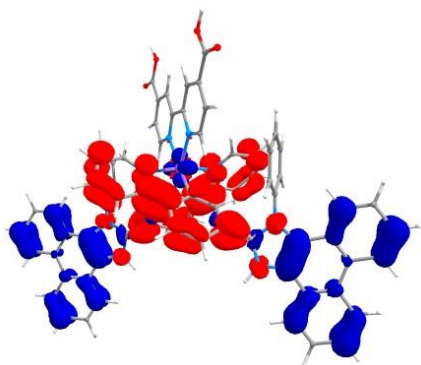
 $S_0 \rightarrow S_3$ 

| Donor | Acceptor |       |       |       |
|-------|----------|-------|-------|-------|
|       | Ir       | NN    | N-C   | N-C   |
| Ir    | 0.001    | 0.000 | 0.016 | 0.016 |
| NN    | 0.000    | 0.000 | 0.001 | 0.001 |
| N-C   | 0.017    | 0.005 | 0.230 | 0.230 |
| N-C   | 0.017    | 0.005 | 0.230 | 0.230 |

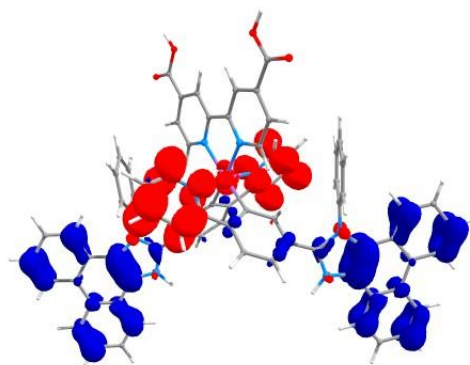
 $S_0 \rightarrow S_4$ 

| Donor | Acceptor |       |       |       |
|-------|----------|-------|-------|-------|
|       | Ir       | NN    | N-C   | N-C   |
| Ir    | 0.003    | 0.007 | 0.052 | 0.052 |
| NN    | 0.001    | 0.001 | 0.011 | 0.011 |
| N-C   | 0.011    | 0.027 | 0.197 | 0.197 |
| N-C   | 0.011    | 0.027 | 0.197 | 0.197 |

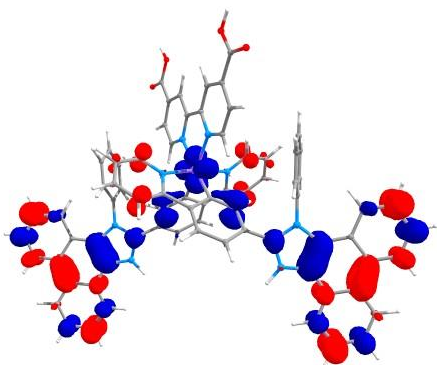
 $S_0 \rightarrow S_5$ 

| Donor | Acceptor |       |       |       |
|-------|----------|-------|-------|-------|
|       | Ir       | NN    | N-C   | N-C   |
| Ir    | 0.000    | 0.000 | 0.029 | 0.029 |
| NN    | 0.000    | 0.000 | 0.002 | 0.002 |
| N-C   | 0.004    | 0.002 | 0.234 | 0.234 |
| N-C   | 0.003    | 0.002 | 0.229 | 0.229 |

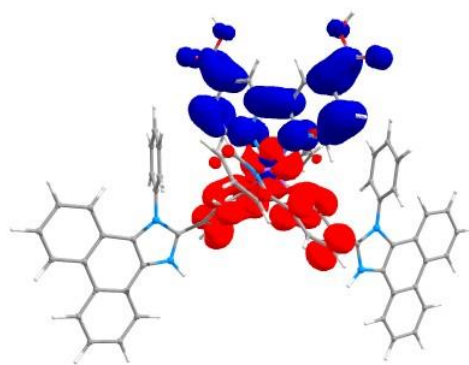
 $T_1 \rightarrow S_0$ 

| Donor | Acceptor |       |       |       |
|-------|----------|-------|-------|-------|
|       | Ir       | NN    | N-C   | N-C   |
| Ir    | 0.017    | 0.001 | 0.014 | 0.014 |
| NN    | 0.340    | 0.029 | 0.287 | 0.287 |
| N-C   | 0.002    | 0.000 | 0.002 | 0.002 |
| N-C   | 0.002    | 0.000 | 0.002 | 0.002 |

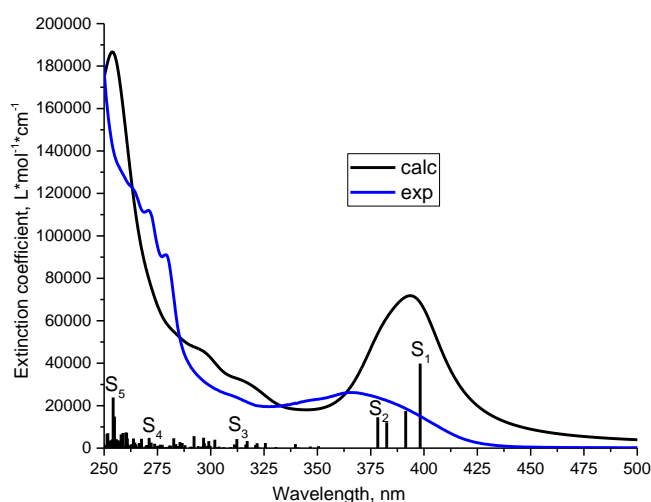

Figure S24. Absorption spectra of **4** in water: experimental (blue) and calculated (black) lines with oscillator strengths of electronic transitions (bars).

Table S18. Experimental and calculated absorption maxima ( $\lambda$ ), extinction coefficients ( $\epsilon$ ), oscillator strengths ( $f$ ) **4**.

| Complex  | $\lambda_{\text{abs}}$ , nm (exp) | $\epsilon \cdot 10^{-3}$ , $\text{L} \cdot \text{mol}^{-1} \cdot \text{cm}^{-1}$ (exp) | Transitions           | $\lambda_{\text{abs}}$ , nm (calc) | $f$ (calc) | Contribution of main NTO pair in transition (%) |
|----------|-----------------------------------|----------------------------------------------------------------------------------------|-----------------------|------------------------------------|------------|-------------------------------------------------|
| <b>4</b> | 263sh                             | 128                                                                                    | $S_0 \rightarrow S_5$ | 255                                | 0.20       | 27                                              |
|          | 271                               | 117                                                                                    | $S_0 \rightarrow S_4$ | 271                                | 0.07       | 36                                              |
|          | 308sh                             | 25                                                                                     | $S_0 \rightarrow S_3$ | 312                                | 0.06       | 53                                              |
|          | 367                               | 27                                                                                     | $S_0 \rightarrow S_2$ | 378                                | 0.20       | 97                                              |
|          |                                   |                                                                                        | $S_0 \rightarrow S_1$ | 398                                | 0.54       | 94                                              |

Table S19. The decrease (blue) and increase (red) in electron density for most intensive electronic absorption transitions of **4**. The data for the corresponding interfragment charge transfer (IFCT) are given below the figures. Diagonal values represent intraligand transitions, off-diagonal values represent a charge transfer from “Donor” to “Acceptor”.

| 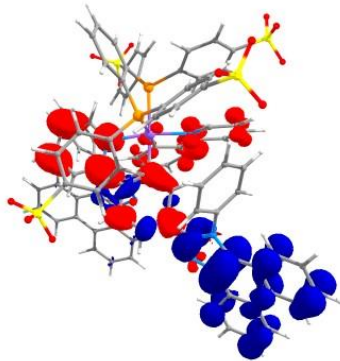 |          |       |       |       |  |          |       |       |       |
|-------------------------------------------------------------------------------------|----------|-------|-------|-------|--------------------------------------------------------------------------------------|----------|-------|-------|-------|
| $S_0 \rightarrow S_1$                                                               |          |       |       |       | $S_0 \rightarrow S_2$                                                                |          |       |       |       |
| Donor                                                                               | Acceptor |       |       |       | Donor                                                                                | Acceptor |       |       |       |
|                                                                                     | Ir       | PP    | N-C   | N-C   |                                                                                      | Ir       | PP    | N-C   | N-C   |
| Ir                                                                                  | 0.000    | 0.000 | 0.005 | 0.002 | Ir                                                                                   | 0.000    | 0.000 | 0.000 | 0.002 |
| PP                                                                                  | 0.000    | 0.000 | 0.004 | 0.001 | PP                                                                                   | 0.000    | 0.000 | 0.001 | 0.003 |
| N-C                                                                                 | 0.021    | 0.036 | 0.616 | 0.190 | N-C                                                                                  | 0.016    | 0.030 | 0.114 | 0.532 |
| N-C                                                                                 | 0.003    | 0.005 | 0.089 | 0.027 | N-C                                                                                  | 0.007    | 0.013 | 0.050 | 0.232 |



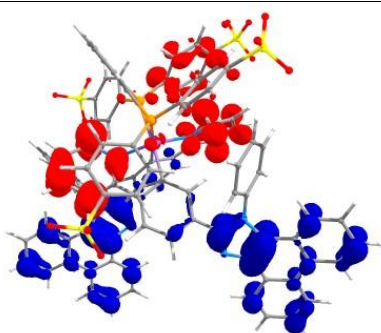
 $S_0 \rightarrow S_3$ 

| Donor | Acceptor |       |       |       |
|-------|----------|-------|-------|-------|
|       | Ir       | PP    | N-C   | N-C   |
| Ir    | 0.001    | 0.009 | 0.010 | 0.012 |
| PP    | 0.000    | 0.003 | 0.003 | 0.004 |
| N-C   | 0.017    | 0.110 | 0.129 | 0.146 |
| N-C   | 0.023    | 0.152 | 0.179 | 0.203 |

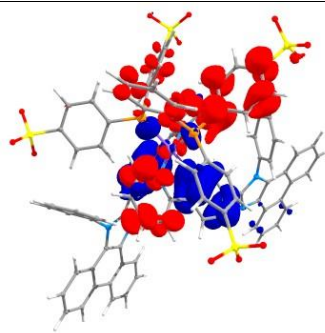
 $S_0 \rightarrow S_4$ 

| Donor | Acceptor |       |       |       |
|-------|----------|-------|-------|-------|
|       | Ir       | PP    | N-C   | N-C   |
| Ir    | 0.001    | 0.019 | 0.007 | 0.008 |
| PP    | 0.005    | 0.086 | 0.031 | 0.036 |
| N-C   | 0.010    | 0.178 | 0.065 | 0.074 |
| N-C   | 0.015    | 0.261 | 0.096 | 0.109 |

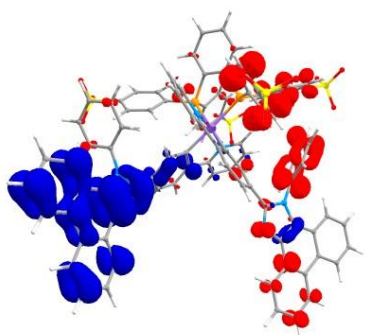
 $S_0 \rightarrow S_5$ 

| Donor | Acceptor |       |       |       |
|-------|----------|-------|-------|-------|
|       | Ir       | PP    | N-C   | N-C   |
| Ir    | 0.000    | 0.009 | 0.012 | 0.006 |
| PP    | 0.000    | 0.013 | 0.017 | 0.009 |
| N-C   | 0.003    | 0.099 | 0.132 | 0.066 |
| N-C   | 0.007    | 0.210 | 0.278 | 0.139 |

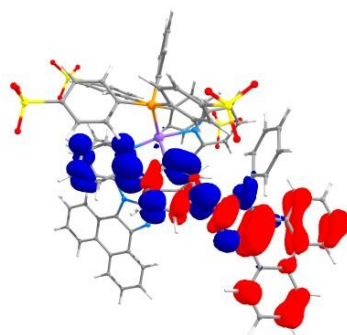
 $T_1 \rightarrow S_0$ 

| Donor | Acceptor |       |       |       |
|-------|----------|-------|-------|-------|
|       | Ir       | PP    | N-C   | N-C   |
| Ir    | 0.000    | 0.000 | 0.000 | 0.014 |
| PP    | 0.000    | 0.000 | 0.000 | 0.021 |
| N-C   | 0.000    | 0.000 | 0.000 | 0.022 |
| N-C   | 0.009    | 0.003 | 0.005 | 0.926 |

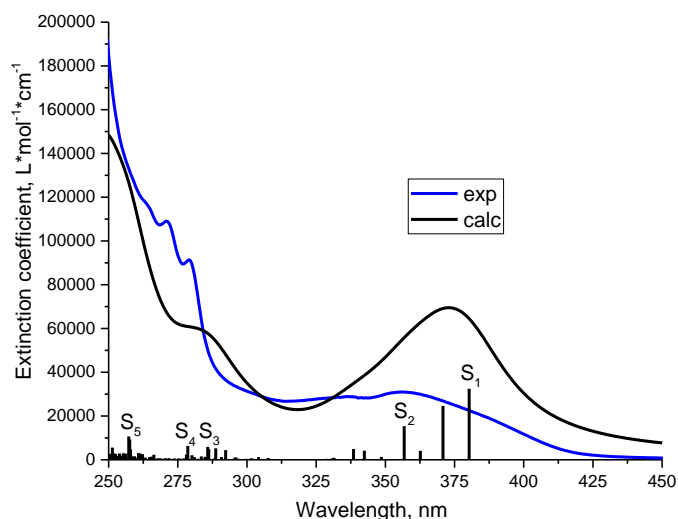

Figure S25. Absorption spectra of  $\{4+2H^+\}$  in water: experimental (blue) and calculated (black) lines with oscillator strengths of electronic transitions (bars).

Table S20. Experimental and calculated absorption maxima ( $\lambda$ ), extinction coefficients ( $\epsilon$ ), oscillator strengths ( $f$ )  $\{4+2H^+\}$ .

| Complex      | $\lambda_{\text{abs}}$ , nm<br>(exp) | $\epsilon \cdot 10^{-3}$ ,<br>$L \cdot \text{mol}^{-1} \cdot \text{cm}^{-1}$<br>(exp) | Transitions | $\lambda_{\text{abs}}$ , nm<br>(calc) | $f$<br>(calc) | Contribution of main<br>NTO pair in transition<br>(%) |
|--------------|--------------------------------------|---------------------------------------------------------------------------------------|-------------|---------------------------------------|---------------|-------------------------------------------------------|
| $\{4+2H^+\}$ | 264sh                                | 117                                                                                   | $S_0-S_5$   | 257                                   | 0.19          | 28                                                    |
|              | 271                                  | 110                                                                                   | $S_0-S_4$   | 279                                   | 0.11          | 41                                                    |
|              | 279                                  | 91                                                                                    | $S_0-S_3$   | 286                                   | 0.10          | 58                                                    |
|              | 357                                  | 31                                                                                    | $S_0-S_2$   | 357                                   | 0.27          | 70                                                    |
|              |                                      |                                                                                       | $S_0-S_1$   | 380                                   | 0.57          | 92                                                    |

Table S21. The decrease (blue) and increase (red) in electron density for most intensive electronic absorption transitions of  $\{4+2H^+\}$ . The data for the corresponding interfragment charge transfer (IFCT) are given below the figures. Diagonal values represent intraligand transitions, off-diagonal values represent a charge transfer from "Donor" to "Acceptor".

| 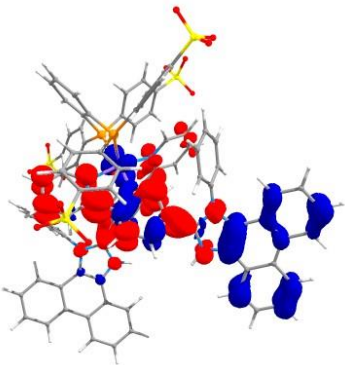 |          |       |       |       |  |          |       |       |       |
|-------------------------------------------------------------------------------------|----------|-------|-------|-------|--------------------------------------------------------------------------------------|----------|-------|-------|-------|
| $S_0 \rightarrow S_1$                                                               |          |       |       |       | $S_0 \rightarrow S_2$                                                                |          |       |       |       |
| Donor                                                                               | Acceptor |       |       |       | Donor                                                                                | Acceptor |       |       |       |
|                                                                                     | Ir       | PP    | N-C   | N-C   |                                                                                      | Ir       | PP    | N-C   | N-C   |
| Ir                                                                                  | 0.001    | 0.002 | 0.059 | 0.029 | Ir                                                                                   | 0.001    | 0.001 | 0.017 | 0.040 |
| PP                                                                                  | 0.001    | 0.001 | 0.025 | 0.012 | PP                                                                                   | 0.001    | 0.001 | 0.009 | 0.020 |
| N-C                                                                                 | 0.010    | 0.018 | 0.440 | 0.215 | N-C                                                                                  | 0.010    | 0.013 | 0.162 | 0.379 |
| N-C                                                                                 | 0.003    | 0.005 | 0.121 | 0.059 | N-C                                                                                  | 0.006    | 0.008 | 0.100 | 0.233 |



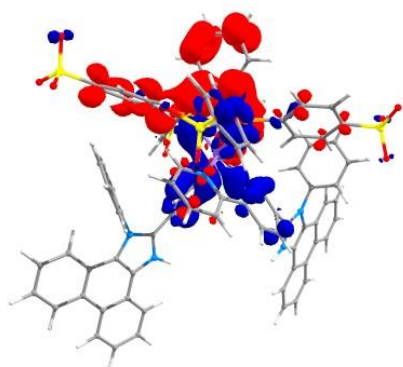
 $S_0 \rightarrow S_3$ 

| Donor | Acceptor |       |       |       |
|-------|----------|-------|-------|-------|
|       | Ir       | PP    | N-C   | N-C   |
| Ir    | 0.002    | 0.034 | 0.015 | 0.006 |
| PP    | 0.016    | 0.225 | 0.100 | 0.038 |
| N-C   | 0.017    | 0.240 | 0.106 | 0.040 |
| N-C   | 0.007    | 0.095 | 0.042 | 0.016 |

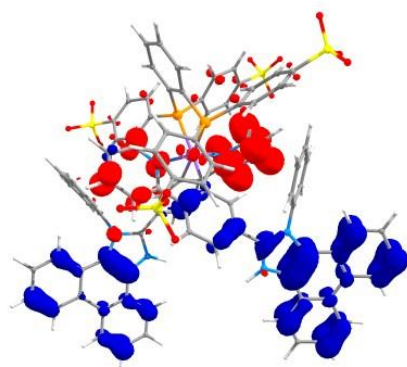
 $S_0 \rightarrow S_4$ 

| Donor | Acceptor |       |       |       |
|-------|----------|-------|-------|-------|
|       | Ir       | PP    | N-C   | N-C   |
| Ir    | 0.002    | 0.013 | 0.008 | 0.025 |
| PP    | 0.002    | 0.016 | 0.009 | 0.030 |
| N-C   | 0.018    | 0.133 | 0.077 | 0.250 |
| N-C   | 0.015    | 0.116 | 0.067 | 0.219 |

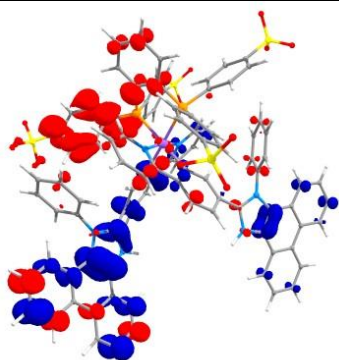
 $S_0 \rightarrow S_5$ 

| Donor | Acceptor |       |       |       |
|-------|----------|-------|-------|-------|
|       | Ir       | PP    | N-C   | N-C   |
| Ir    | 0.000    | 0.006 | 0.005 | 0.009 |
| PP    | 0.000    | 0.008 | 0.008 | 0.012 |
| N-C   | 0.004    | 0.082 | 0.081 | 0.130 |
| N-C   | 0.009    | 0.181 | 0.178 | 0.286 |

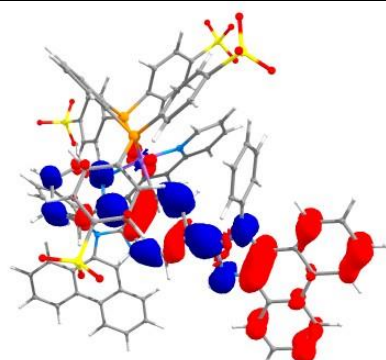
 $T_1 \rightarrow S_0$ 

| Donor | Acceptor |       |       |       |
|-------|----------|-------|-------|-------|
|       | Ir       | PP    | N-C   | N-C   |
| Ir    | 0.000    | 0.001 | 0.013 | 0.000 |
| PP    | 0.001    | 0.001 | 0.017 | 0.000 |
| N-C   | 0.027    | 0.039 | 0.869 | 0.012 |
| N-C   | 0.001    | 0.001 | 0.018 | 0.000 |
